# Supplementary material for: COVID-19 Vaccine Passport and International Traveling: The Combined Effect of Two Nudges on Americans’ Support for the Pass
Source: MDPI journal article supplement (doi:10.3390/ijerph18168800), 2021-08-20
Supplement: s1 [file s1]

## Supplementary Material

### 1. Factor analysis

Table S1: Factor analysis results using the first factor to consider all the statements about the pass

|                                   | (1)                  | (2)                  | (3)                  | (4)                  | (5)                   | (6)                   |
|-----------------------------------|----------------------|----------------------|----------------------|----------------------|-----------------------|-----------------------|
|                                   | Scores for factor 1   | Scores for factor 1   |
| Status Quo                        | 0.119***<br>(0.008)  | 0.119***<br>(0.008)  | 0.137***<br>(0.001)  | 0.137***<br>(0.001)  | 0.141***<br>(0.000)   | 0.143***<br>(0.000)   |
| Peer Effect                       | 0.0535<br>(0.246)    | 0.0535<br>(0.246)    | 0.0622<br>(0.141)    | 0.0622<br>(0.141)    | 0.100***<br>(0.004)   | 0.1000***<br>(0.004)  |
| Peer Effect Status Quo            | 0.141***<br>(0.002)  | 0.141***<br>(0.002)  | 0.160***<br>(0.000)  | 0.160***<br>(0.000)  | 0.180***<br>(0.000)   | 0.180***<br>(0.000)   |
| Age                               |                      |                      | 0.00175<br>(0.197)   | 0.00175<br>(0.197)   | 0.0000631<br>(0.956)  | 0.000360<br>(0.751)   |
| Income                            |                      |                      | 0.00885**<br>(0.045) | 0.00885**<br>(0.045) | 0.000206<br>(0.957)   | -0.00134<br>(0.729)   |
| Female                            |                      |                      | -0.0115<br>(0.702)   | -0.0115<br>(0.702)   | 0.0268<br>(0.285)     | 0.0300<br>(0.233)     |
| White                             |                      |                      | -0.0256<br>(0.455)   | -0.0256<br>(0.455)   | -0.0448<br>(0.118)    | -0.0395<br>(0.170)    |
| Political Scale                   |                      |                      | -0.184***<br>(0.000) | -0.184***<br>(0.000) | -0.125***<br>(0.000)  | -0.124***<br>(0.000)  |
| Education                         |                      |                      | 0.0681***<br>(0.000) | 0.0681***<br>(0.000) | 0.0353***<br>(0.001)  | 0.0297***<br>(0.005)  |
| In full or part time employment   |                      |                      | -0.0165<br>(0.677)   | -0.0165<br>(0.677)   | -0.0483<br>(0.137)    | -0.0559*<br>(0.088)   |
| Student                           |                      |                      | 0.236***<br>(0.000)  | 0.236***<br>(0.000)  | 0.100**<br>(0.032)    | 0.0932**<br>(0.047)   |
| Republican                        |                      |                      | -0.317***<br>(0.000) | -0.317***<br>(0.000) | -0.161***<br>(0.001)  | -0.165***<br>(0.000)  |
| Trust in Federal Government       |                      |                      |                      |                      | 0.0391***<br>(0.000)  | 0.0388***<br>(0.000)  |
| Trust in State Government         |                      |                      |                      |                      | -0.0226***<br>(0.001) | -0.0231***<br>(0.001) |
| Trust in CDC                      |                      |                      |                      |                      | 0.149***<br>(0.000)   | 0.149***<br>(0.000)   |
| Trust in Pharmaceutical companies |                      |                      |                      |                      | 0.0258***<br>(0.000)  | 0.0257***<br>(0.000)  |
| Trust in Tech companies           |                      |                      |                      |                      | 0.00160<br>(0.835)    | 0.000701<br>(0.927)   |
| Frequency of travel               |                      |                      |                      |                      |                       | 0.0277**<br>(0.024)   |
| Constant                          | -0.0781**<br>(0.013) | -0.0781**<br>(0.013) | 0.0475<br>(0.550)    | 0.0475<br>(0.550)    | -0.918***<br>(0.000)  | -0.923***<br>(0.000)  |
| Observations                      | 3639                 | 3639                 | 3489                 | 3489                 | 3461                  | 3461                  |
| Adjusted $R^2$                    | 0.002                | 0.002                | 0.220                | 0.220                | 0.467                 | 0.467                 |

*p*-values in parentheses

\*  $p < 0.10$ , \*\*  $p < 0.05$ , \*\*\*  $p < 0.01$

Factor analysis/correlation                      Number of obs    =        3,639  
Method: principal factors                      Retained factors =        5  
Rotation: (unrotated)                      Number of params =       55

| Factor   | Eigenvalue | Difference | Proportion | Cumulative |
|----------|------------|------------|------------|------------|
| Factor1  | 7.18628    | 6.41494    | 0.9111     | 0.9111     |
| Factor2  | 0.77134    | 0.56656    | 0.0978     | 1.0089     |
| Factor3  | 0.20478    | 0.02751    | 0.0260     | 1.0349     |
| Factor4  | 0.17727    | 0.07865    | 0.0225     | 1.0574     |
| Factor5  | 0.09862    | 0.11482    | 0.0125     | 1.0699     |
| Factor6  | -0.01621   | 0.02471    | -0.0021    | 1.0678     |
| Factor7  | -0.04092   | 0.01193    | -0.0052    | 1.0626     |
| Factor8  | -0.05285   | 0.00414    | -0.0067    | 1.0559     |
| Factor9  | -0.05699   | 0.00850    | -0.0072    | 1.0487     |
| Factor10 | -0.06549   | 0.00325    | -0.0083    | 1.0404     |
| Factor11 | -0.06875   | 0.03420    | -0.0087    | 1.0317     |
| Factor12 | -0.10295   | 0.04400    | -0.0131    | 1.0186     |
| Factor13 | -0.14695   | .          | -0.0186    | 1.0000     |

LR test: independent vs. saturated:  $\chi^2(78) = 4.0e+04$  Prob> $\chi^2 = 0.0000$

Factor loadings (pattern matrix) and unique variances

| Variable      | Factor1 | Factor2 | Factor3 | Factor4 | Factor5 | Uniqueness |
|---------------|---------|---------|---------|---------|---------|------------|
| pass_impore~e | 0.8847  | 0.2785  | 0.0718  | -0.0427 | -0.1010 | 0.1227     |
| pass_preve~d  | 0.8057  | 0.3012  | 0.0467  | -0.0603 | -0.1310 | 0.2372     |
| pass_norma~y  | 0.8668  | 0.2857  | 0.0181  | -0.0448 | -0.0586 | 0.1613     |
| pass_limit~y  | -0.8783 | 0.2984  | -0.1140 | 0.0523  | -0.0269 | 0.1230     |
| pass_socia~c  | -0.8507 | 0.2912  | -0.1094 | 0.1176  | -0.0344 | 0.1644     |
| pass_privacy  | -0.8421 | 0.2603  | -0.0801 | 0.1173  | -0.0774 | 0.1970     |
| pass_unfai~l  | -0.8231 | 0.2474  | 0.0671  | -0.1790 | 0.0762  | 0.2189     |
| pass_unfai~s  | -0.5092 | 0.2511  | 0.2729  | -0.0142 | 0.0779  | 0.5969     |
| pass_forge    | -0.3603 | 0.0362  | 0.2641  | 0.1664  | 0.0005  | 0.7715     |
| pass_induc~e  | 0.5484  | 0.2622  | -0.1169 | -0.0629 | 0.1427  | 0.5925     |
| pass_fligh~r  | 0.8280  | 0.1359  | -0.0182 | 0.1952  | 0.0927  | 0.2489     |
| pass_inten~n  | -0.0973 | 0.2293  | -0.0527 | -0.1087 | 0.0970  | 0.9139     |
| pass_prosc~s  | 0.8582  | 0.1199  | -0.0165 | 0.1603  | 0.0984  | 0.2135     |

2. Regression tables for the statements capturing respondents' support for the pass

Table S2: Determinants of agreement with the importance of a COVID pass to fight the pandemic

|                                   | (1)<br>Pass<br>importance | (2)<br>Pass<br>importance | (3)<br>Pass<br>importance | (4)<br>Pass<br>importance | (5)<br>Pass<br>importance | (6)<br>Pass<br>importance |
|-----------------------------------|---------------------------|---------------------------|---------------------------|---------------------------|---------------------------|---------------------------|
| Status Quo                        | 0.478***<br>(0.001)       | 0.478***<br>(0.001)       | 0.507***<br>(0.000)       | 0.507***<br>(0.000)       | 0.519***<br>(0.000)       | 0.525***<br>(0.000)       |
| Peer Effect                       | 0.449***<br>(0.003)       | 0.449***<br>(0.003)       | 0.489***<br>(0.001)       | 0.489***<br>(0.001)       | 0.564***<br>(0.000)       | 0.560***<br>(0.000)       |
| Peer Effect Status Quo            | 0.665***<br>(0.000)       | 0.665***<br>(0.000)       | 0.713***<br>(0.000)       | 0.713***<br>(0.000)       | 0.711***<br>(0.000)       | 0.707***<br>(0.000)       |
| Age                               |                           |                           | 0.0100**<br>(0.028)       | 0.0100**<br>(0.028)       | 0.00385<br>(0.331)        | 0.00542<br>(0.171)        |
| Income                            |                           |                           | 0.0321**<br>(0.038)       | 0.0321**<br>(0.038)       | -0.00303<br>(0.825)       | -0.0114<br>(0.408)        |
| Female                            |                           |                           | 0.0321<br>(0.755)         | 0.0321<br>(0.755)         | 0.165*<br>(0.061)         | 0.182**<br>(0.039)        |
| White                             |                           |                           | -0.197*<br>(0.097)        | -0.197*<br>(0.097)        | -0.245**<br>(0.017)       | -0.215**<br>(0.036)       |
| Political Scale                   |                           |                           | -0.482***<br>(0.000)      | -0.482***<br>(0.000)      | -0.297***<br>(0.000)      | -0.294***<br>(0.000)      |
| Education                         |                           |                           | 0.247***<br>(0.000)       | 0.247***<br>(0.000)       | 0.128***<br>(0.000)       | 0.0972***<br>(0.010)      |
| In full or part time employment   |                           |                           | -0.00658<br>(0.961)       | -0.00658<br>(0.961)       | -0.110<br>(0.330)         | -0.148<br>(0.191)         |
| Student                           |                           |                           | 0.855***<br>(0.000)       | 0.855***<br>(0.000)       | 0.394**<br>(0.018)        | 0.360**<br>(0.032)        |
| Republican                        |                           |                           | -1.080***<br>(0.000)      | -1.080***<br>(0.000)      | -0.490***<br>(0.002)      | -0.516***<br>(0.001)      |
| Trust in Federal Government       |                           |                           |                           |                           | 0.172***<br>(0.000)       | 0.170***<br>(0.000)       |
| Trust in State Government         |                           |                           |                           |                           | -0.0713***<br>(0.003)     | -0.0742***<br>(0.002)     |
| Trust in CDC                      |                           |                           |                           |                           | 0.452***<br>(0.000)       | 0.455***<br>(0.000)       |
| Trust in Pharmaceutical companies |                           |                           |                           |                           | 0.0521**<br>(0.043)       | 0.0517**<br>(0.044)       |
| Trust in Tech companies           |                           |                           |                           |                           | 0.0662**<br>(0.012)       | 0.0616**<br>(0.019)       |
| Frequency of travel               |                           |                           |                           |                           |                           | 0.150***<br>(0.000)       |
| Constant                          | 6.139***<br>(0.000)       | 6.139***<br>(0.000)       | 5.949***<br>(0.000)       | 5.949***<br>(0.000)       | 2.798***<br>(0.000)       | 2.770***<br>(0.000)       |
| Observations                      | 3977                      | 3977                      | 3784                      | 3784                      | 3705                      | 3705                      |
| Adjusted $R^2$                    | 0.005                     | 0.005                     | 0.153                     | 0.153                     | 0.387                     | 0.388                     |

$p$ -values in parentheses

\*  $p < 0.10$ , \*\*  $p < 0.05$ , \*\*\*  $p < 0.01$

Table S3: Determinants of agreement with the COVID pass helping to reduce the spread of new variants of the virus

|                                   | (1)                         | (2)                         | (3)                         | (4)                         | (5)                         | (6)                         |
|-----------------------------------|-----------------------------|-----------------------------|-----------------------------|-----------------------------|-----------------------------|-----------------------------|
|                                   | Pass prevents<br>the spread |
| Status Quo                        | 0.326**<br>(0.032)          | 0.326**<br>(0.032)          | 0.393***<br>(0.007)         | 0.393***<br>(0.007)         | 0.399***<br>(0.003)         | 0.404***<br>(0.002)         |
| Peer Effect                       | 0.444***<br>(0.004)         | 0.444***<br>(0.004)         | 0.480***<br>(0.001)         | 0.480***<br>(0.001)         | 0.547***<br>(0.000)         | 0.544***<br>(0.000)         |
| Peer Effect Status Quo            | 0.787***<br>(0.000)         | 0.787***<br>(0.000)         | 0.874***<br>(0.000)         | 0.874***<br>(0.000)         | 0.882***<br>(0.000)         | 0.880***<br>(0.000)         |
| Age                               |                             |                             | 0.00527<br>(0.259)          | 0.00527<br>(0.259)          | 0.000639<br>(0.988)         | 0.00115<br>(0.786)          |
| Income                            |                             |                             | 0.0351**<br>(0.026)         | 0.0351**<br>(0.026)         | 0.00649<br>(0.656)          | 0.000665<br>(0.964)         |
| Female                            |                             |                             | -0.109<br>(0.301)           | -0.109<br>(0.301)           | 0.0143<br>(0.880)           | 0.0259<br>(0.784)           |
| White                             |                             |                             | -0.0234<br>(0.847)          | -0.0234<br>(0.847)          | -0.0766<br>(0.486)          | -0.0562<br>(0.611)          |
| Political Scale                   |                             |                             | -0.487***<br>(0.000)        | -0.487***<br>(0.000)        | -0.316***<br>(0.000)        | -0.314***<br>(0.000)        |
| Education                         |                             |                             | 0.196***<br>(0.000)         | 0.196***<br>(0.000)         | 0.0863**<br>(0.025)         | 0.0652<br>(0.100)           |
| In full or part time employment   |                             |                             | -0.125<br>(0.353)           | -0.125<br>(0.353)           | -0.243**<br>(0.042)         | -0.269**<br>(0.025)         |
| Student                           |                             |                             | 0.663***<br>(0.001)         | 0.663***<br>(0.001)         | 0.240<br>(0.188)            | 0.216<br>(0.238)            |
| Republican                        |                             |                             | -0.968***<br>(0.000)        | -0.968***<br>(0.000)        | -0.454***<br>(0.007)        | -0.472***<br>(0.005)        |
| Trust in Federal Government       |                             |                             |                             |                             | 0.162***<br>(0.000)         | 0.162***<br>(0.000)         |
| Trust in State Government         |                             |                             |                             |                             | -0.0692***<br>(0.008)       | -0.0712***<br>(0.007)       |
| Trust in CDC                      |                             |                             |                             |                             | 0.407***<br>(0.000)         | 0.409***<br>(0.000)         |
| Trust in Pharmaceutical companies |                             |                             |                             |                             | 0.0501*<br>(0.072)          | 0.0500*<br>(0.073)          |
| Trust in Tech companies           |                             |                             |                             |                             | 0.0413<br>(0.132)           | 0.0380<br>(0.166)           |
| Frequency of travel               |                             |                             |                             |                             |                             | 0.104**<br>(0.022)          |
| Constant                          | 5.897***<br>(0.000)         | 5.897***<br>(0.000)         | 6.104***<br>(0.000)         | 6.104***<br>(0.000)         | 3.306***<br>(0.000)         | 3.286***<br>(0.000)         |
| Observations                      | 3974                        | 3974                        | 3781                        | 3781                        | 3704                        | 3704                        |
| Adjusted $R^2$                    | 0.006                       | 0.006                       | 0.141                       | 0.141                       | 0.320                       | 0.321                       |

$p$ -values in parentheses

\*  $p < 0.10$ , \*\*  $p < 0.05$ , \*\*\*  $p < 0.01$

Table S4: Determinants of agreement with the COVID pass helping the return to normalcy

|                                   | (1)                              | (2)                              | (3)                              | (4)                              | (5)                              | (6)                              |
|-----------------------------------|----------------------------------|----------------------------------|----------------------------------|----------------------------------|----------------------------------|----------------------------------|
|                                   | Pass helps return<br>to normalcy |
| Status Quo                        | 0.409***<br>(0.006)              | 0.409***<br>(0.006)              | 0.470***<br>(0.001)              | 0.470***<br>(0.001)              | 0.462***<br>(0.000)              | 0.471***<br>(0.000)              |
| Peer Effect                       | 0.395**<br>(0.010)               | 0.395**<br>(0.010)               | 0.447***<br>(0.003)              | 0.447***<br>(0.003)              | 0.487***<br>(0.000)              | 0.480***<br>(0.000)              |
| Peer Effect Status Quo            | 0.737***<br>(0.000)              | 0.737***<br>(0.000)              | 0.812***<br>(0.000)              | 0.812***<br>(0.000)              | 0.799***<br>(0.000)              | 0.792***<br>(0.000)              |
| Age                               |                                  |                                  | 0.00541<br>(0.247)               | 0.00541<br>(0.247)               | -0.00129<br>(0.751)              | 0.00111<br>(0.785)               |
| Income                            |                                  |                                  | 0.0383**<br>(0.015)              | 0.0383**<br>(0.015)              | 0.00239<br>(0.864)               | -0.0105<br>(0.457)               |
| Female                            |                                  |                                  | -0.000601<br>(0.995)             | -0.000601<br>(0.995)             | 0.139<br>(0.127)                 | 0.164*<br>(0.071)                |
| White                             |                                  |                                  | -0.149<br>(0.215)                | -0.149<br>(0.215)                | -0.155<br>(0.140)                | -0.110<br>(0.293)                |
| Political Scale                   |                                  |                                  | -0.475***<br>(0.000)             | -0.475***<br>(0.000)             | -0.302***<br>(0.000)             | -0.297***<br>(0.000)             |
| Education                         |                                  |                                  | 0.198***<br>(0.000)              | 0.198***<br>(0.000)              | 0.0885**<br>(0.017)              | 0.0416<br>(0.275)                |
| In full or part time employment   |                                  |                                  | 0.0149<br>(0.913)                | 0.0149<br>(0.913)                | -0.100<br>(0.393)                | -0.160<br>(0.173)                |
| Student                           |                                  |                                  | 0.687***<br>(0.000)              | 0.687***<br>(0.000)              | 0.251<br>(0.155)                 | 0.195<br>(0.269)                 |
| Republican                        |                                  |                                  | -0.960***<br>(0.000)             | -0.960***<br>(0.000)             | -0.437***<br>(0.006)             | -0.478***<br>(0.002)             |
| Trust in Federal Government       |                                  |                                  |                                  |                                  | 0.152***<br>(0.000)              | 0.150***<br>(0.000)              |
| Trust in State Government         |                                  |                                  |                                  |                                  | -0.0726***<br>(0.004)            | -0.0771***<br>(0.002)            |
| Trust in CDC                      |                                  |                                  |                                  |                                  | 0.428***<br>(0.000)              | 0.432***<br>(0.000)              |
| Trust in Pharmaceutical companies |                                  |                                  |                                  |                                  | 0.109***<br>(0.000)              | 0.108***<br>(0.000)              |
| Trust in Tech companies           |                                  |                                  |                                  |                                  | 0.0672**<br>(0.013)              | 0.0603**<br>(0.026)              |
| Frequency of travel               |                                  |                                  |                                  |                                  |                                  | 0.231***<br>(0.000)              |
| Constant                          | 5.779***<br>(0.000)              | 5.779***<br>(0.000)              | 5.857***<br>(0.000)              | 5.857***<br>(0.000)              | 2.747***<br>(0.000)              | 2.707***<br>(0.000)              |
| Observations                      | 3965                             | 3965                             | 3772                             | 3772                             | 3696                             | 3696                             |
| Adjusted $R^2$                    | 0.005                            | 0.005                            | 0.137                            | 0.137                            | 0.367                            | 0.372                            |

*p*-values in parentheses  
\*  $p < 0.10$ , \*\*  $p < 0.05$ , \*\*\*  $p < 0.01$

Table S5: Determinants of agreement with the COVID pass being a limitation of liberties

|                                   | (1)                      | (2)                      | (3)                      | (4)                      | (5)                      | (6)                      |
|-----------------------------------|--------------------------|--------------------------|--------------------------|--------------------------|--------------------------|--------------------------|
|                                   | Pass limits<br>liberties |
| Status Quo                        | -0.372**<br>(0.016)      | -0.372**<br>(0.016)      | -0.388***<br>(0.005)     | -0.388***<br>(0.005)     | -0.409***<br>(0.001)     | -0.413***<br>(0.001)     |
| Peer Effect                       | 0.0294<br>(0.853)        | 0.0294<br>(0.853)        | -0.0141<br>(0.922)       | -0.0141<br>(0.922)       | -0.103<br>(0.433)        | -0.101<br>(0.438)        |
| Peer Effect Status Quo            | -0.383**<br>(0.013)      | -0.383**<br>(0.013)      | -0.452***<br>(0.001)     | -0.452***<br>(0.001)     | -0.486***<br>(0.000)     | -0.485***<br>(0.000)     |
| Age                               |                          |                          | 0.00395<br>(0.388)       | 0.00395<br>(0.388)       | 0.00844**<br>(0.039)     | 0.00771*<br>(0.059)      |
| Income                            |                          |                          | -0.0249*<br>(0.097)      | -0.0249*<br>(0.097)      | 0.000415<br>(0.976)      | 0.00421<br>(0.767)       |
| Female                            |                          |                          | 0.0332<br>(0.742)        | 0.0332<br>(0.742)        | -0.0814<br>(0.369)       | -0.0891<br>(0.326)       |
| White                             |                          |                          | 0.102<br>(0.385)         | 0.102<br>(0.385)         | 0.160<br>(0.134)         | 0.147<br>(0.173)         |
| Political Scale                   |                          |                          | 0.647***<br>(0.000)      | 0.647***<br>(0.000)      | 0.460***<br>(0.000)      | 0.459***<br>(0.000)      |
| Education                         |                          |                          | -0.276***<br>(0.000)     | -0.276***<br>(0.000)     | -0.175***<br>(0.000)     | -0.161***<br>(0.000)     |
| In full or part time employment   |                          |                          | 0.175<br>(0.188)         | 0.175<br>(0.188)         | 0.257**<br>(0.029)       | 0.275**<br>(0.020)       |
| Student                           |                          |                          | -0.816***<br>(0.000)     | -0.816***<br>(0.000)     | -0.396**<br>(0.017)      | -0.379**<br>(0.022)      |
| Republican                        |                          |                          | 1.040***<br>(0.000)      | 1.040***<br>(0.000)      | 0.587***<br>(0.001)      | 0.599***<br>(0.001)      |
| Trust in Federal Government       |                          |                          |                          |                          | -0.0827***<br>(0.006)    | -0.0822***<br>(0.006)    |
| Trust in State Government         |                          |                          |                          |                          | 0.0692***<br>(0.005)     | 0.0703***<br>(0.005)     |
| Trust in CDC                      |                          |                          |                          |                          | -0.462***<br>(0.000)     | -0.464***<br>(0.000)     |
| Trust in Pharmaceutical companies |                          |                          |                          |                          | -0.0686**<br>(0.011)     | -0.0683**<br>(0.011)     |
| Trust in Tech companies           |                          |                          |                          |                          | 0.0296<br>(0.284)        | 0.0318<br>(0.251)        |
| Frequency of travel               |                          |                          |                          |                          |                          | -0.0689<br>(0.121)       |
| Constant                          | 3.286***<br>(0.000)      | 3.286***<br>(0.000)      | 2.546***<br>(0.000)      | 2.546***<br>(0.000)      | 5.245***<br>(0.000)      | 5.259***<br>(0.000)      |
| Observations                      | 3908                     | 3908                     | 3727                     | 3727                     | 3656                     | 3656                     |
| Adjusted $R^2$                    | 0.002                    | 0.002                    | 0.225                    | 0.225                    | 0.383                    | 0.383                    |

*p*-values in parentheses\*  $p < 0.10$ , \*\*  $p < 0.05$ , \*\*\*  $p < 0.01$

Table S6: Determinants of agreement with the COVID pass harming the US social fabric

|                                   | (1)<br>The pass harms US<br>social fabric | (2)<br>The pass harms US<br>social fabric | (3)<br>The pass harms US<br>social fabric | (4)<br>The pass harms US<br>social fabric | (5)<br>The pass harms US<br>social fabric | (6)<br>The pass harms US<br>social fabric |
|-----------------------------------|-------------------------------------------|-------------------------------------------|-------------------------------------------|-------------------------------------------|-------------------------------------------|-------------------------------------------|
| Status Quo                        | -0.280*<br>(0.063)                        | -0.280*<br>(0.063)                        | -0.293**<br>(0.036)                       | -0.293**<br>(0.036)                       | -0.305**<br>(0.015)                       | -0.308**<br>(0.014)                       |
| Peer Effect                       | -0.0689<br>(0.650)                        | -0.0689<br>(0.650)                        | -0.104<br>(0.460)                         | -0.104<br>(0.460)                         | -0.195<br>(0.127)                         | -0.195<br>(0.128)                         |
| Peer Effect Status Quo            | -0.468***<br>(0.002)                      | -0.468***<br>(0.002)                      | -0.498***<br>(0.000)                      | -0.498***<br>(0.000)                      | -0.528***<br>(0.000)                      | -0.527***<br>(0.000)                      |
| Age                               |                                           |                                           | -0.00272<br>(0.553)                       | -0.00272<br>(0.553)                       | 0.00162<br>(0.694)                        | 0.00109<br>(0.792)                        |
| Income                            |                                           |                                           | -0.0132<br>(0.372)                        | -0.0132<br>(0.372)                        | 0.0132<br>(0.334)                         | 0.0160<br>(0.251)                         |
| Female                            |                                           |                                           | -0.0776<br>(0.438)                        | -0.0776<br>(0.438)                        | -0.184**<br>(0.040)                       | -0.190**<br>(0.035)                       |
| White                             |                                           |                                           | 0.257**<br>(0.024)                        | 0.257**<br>(0.024)                        | 0.310***<br>(0.003)                       | 0.300***<br>(0.004)                       |
| Political Scale                   |                                           |                                           | 0.566***<br>(0.000)                       | 0.566***<br>(0.000)                       | 0.393***<br>(0.000)                       | 0.392***<br>(0.000)                       |
| Education                         |                                           |                                           | -0.217***<br>(0.000)                      | -0.217***<br>(0.000)                      | -0.121***<br>(0.001)                      | -0.111***<br>(0.004)                      |
| In full or part time employment   |                                           |                                           | 0.129<br>(0.325)                          | 0.129<br>(0.325)                          | 0.201*<br>(0.086)                         | 0.214*<br>(0.070)                         |
| Student                           |                                           |                                           | -0.824***<br>(0.000)                      | -0.824***<br>(0.000)                      | -0.425**<br>(0.011)                       | -0.413**<br>(0.014)                       |
| Republican                        |                                           |                                           | 0.975***<br>(0.000)                       | 0.975***<br>(0.000)                       | 0.514***<br>(0.002)                       | 0.523***<br>(0.002)                       |
| Trust in Federal Government       |                                           |                                           |                                           |                                           | -0.0899***<br>(0.003)                     | -0.0894***<br>(0.003)                     |
| Trust in State Government         |                                           |                                           |                                           |                                           | 0.0803***<br>(0.001)                      | 0.0811***<br>(0.001)                      |
| Trust in CDC                      |                                           |                                           |                                           |                                           | -0.431***<br>(0.000)                      | -0.432***<br>(0.000)                      |
| Trust in Pharmaceutical companies |                                           |                                           |                                           |                                           | -0.0827***<br>(0.002)                     | -0.0825***<br>(0.002)                     |
| Trust in Tech companies           |                                           |                                           |                                           |                                           | 0.0280<br>(0.319)                         | 0.0295<br>(0.294)                         |
| Frequency of travel               |                                           |                                           |                                           |                                           |                                           | -0.0497<br>(0.272)                        |
| Constant                          | 3.112***<br>(0.000)                       | 3.112***<br>(0.000)                       | 2.462***<br>(0.000)                       | 2.462***<br>(0.000)                       | 4.998***<br>(0.000)                       | 5.008***<br>(0.000)                       |
| Observations                      | 3878                                      | 3878                                      | 3707                                      | 3707                                      | 3639                                      | 3639                                      |
| Adjusted $R^2$                    | 0.002                                     | 0.002                                     | 0.190                                     | 0.190                                     | 0.346                                     | 0.346                                     |

p-values in parentheses

\*  $p < 0.10$ , \*\*  $p < 0.05$ , \*\*\*  $p < 0.01$



Table S7: Determinants of agreement with the COVID pass creating privacy concerns

|                                   | (1)                              | (2)                              | (3)                              | (4)                              | (5)                              | (6)                              |
|-----------------------------------|----------------------------------|----------------------------------|----------------------------------|----------------------------------|----------------------------------|----------------------------------|
|                                   | Pass creates<br>privacy concerns |
| Status Quo                        | -0.324**<br>(0.032)              | -0.324**<br>(0.032)              | -0.357**<br>(0.011)              | -0.357**<br>(0.011)              | -0.363***<br>(0.004)             | -0.364***<br>(0.004)             |
| Peer Effect                       | -0.0403<br>(0.791)               | -0.0403<br>(0.791)               | -0.0919<br>(0.515)               | -0.0919<br>(0.515)               | -0.188<br>(0.136)                | -0.188<br>(0.137)                |
| Peer Effect Status Quo            | -0.348**<br>(0.021)              | -0.348**<br>(0.021)              | -0.422***<br>(0.003)             | -0.422***<br>(0.003)             | -0.443***<br>(0.000)             | -0.443***<br>(0.000)             |
| Age                               |                                  |                                  | 0.00596<br>(0.195)               | 0.00596<br>(0.195)               | 0.0113***<br>(0.007)             | 0.0110***<br>(0.008)             |
| Income                            |                                  |                                  | -0.0291*<br>(0.051)              | -0.0291*<br>(0.051)              | -0.00143<br>(0.918)              | 0.0000602<br>(0.997)             |
| Female                            |                                  |                                  | -0.133<br>(0.190)                | -0.133<br>(0.190)                | -0.260***<br>(0.004)             | -0.263***<br>(0.004)             |
| White                             |                                  |                                  | 0.182<br>(0.113)                 | 0.182<br>(0.113)                 | 0.234**<br>(0.024)               | 0.228**<br>(0.028)               |
| Political Scale                   |                                  |                                  | 0.591***<br>(0.000)              | 0.591***<br>(0.000)              | 0.416***<br>(0.000)              | 0.415***<br>(0.000)              |
| Education                         |                                  |                                  | -0.197***<br>(0.000)             | -0.197***<br>(0.000)             | -0.0944**<br>(0.012)             | -0.0890**<br>(0.021)             |
| In full or part time employment   |                                  |                                  | 0.191<br>(0.139)                 | 0.191<br>(0.139)                 | 0.268**<br>(0.020)               | 0.275**<br>(0.018)               |
| Student                           |                                  |                                  | -0.549***<br>(0.002)             | -0.549***<br>(0.002)             | -0.149<br>(0.379)                | -0.143<br>(0.401)                |
| Republican                        |                                  |                                  | 0.933***<br>(0.000)              | 0.933***<br>(0.000)              | 0.475***<br>(0.006)              | 0.480***<br>(0.005)              |
| Trust in Federal Government       |                                  |                                  |                                  |                                  | -0.0838***<br>(0.006)            | -0.0836***<br>(0.007)            |
| Trust in State Government         |                                  |                                  |                                  |                                  | 0.0677***<br>(0.007)             | 0.0682***<br>(0.007)             |
| Trust in CDC                      |                                  |                                  |                                  |                                  | -0.431***<br>(0.000)             | -0.432***<br>(0.000)             |
| Trust in Pharmaceutical companies |                                  |                                  |                                  |                                  | -0.0925***<br>(0.001)            | -0.0924***<br>(0.001)            |
| Trust in Tech companies           |                                  |                                  |                                  |                                  | 0.00284<br>(0.920)               | 0.00372<br>(0.895)               |
| Frequency of travel               |                                  |                                  |                                  |                                  |                                  | -0.0270<br>(0.544)               |
| Constant                          | 3.208***<br>(0.000)              | 3.208***<br>(0.000)              | 2.249***<br>(0.000)              | 2.249***<br>(0.000)              | 4.885***<br>(0.000)              | 4.891***<br>(0.000)              |
| Observations                      | 3882                             | 3882                             | 3707                             | 3707                             | 3636                             | 3636                             |
| Adjusted $R^2$                    | 0.001                            | 0.001                            | 0.195                            | 0.195                            | 0.361                            | 0.360                            |

p-values in parentheses

\*  $p < 0.10$ , \*\*  $p < 0.05$ , \*\*\*  $p < 0.01$

Table S8: Determinants of agreement with the COVID pass being unfair as it allows only people with a COVID pass to travel

|                                   | (1)                                   | (2)                                   | (3)                                   | (4)                                   | (5)                                   | (6)                                   |
|-----------------------------------|---------------------------------------|---------------------------------------|---------------------------------------|---------------------------------------|---------------------------------------|---------------------------------------|
|                                   | Pass is unfair:<br>travel restriction |
| Status Quo                        | -0.223<br>(0.138)                     | -0.223<br>(0.138)                     | -0.310**<br>(0.025)                   | -0.310**<br>(0.025)                   | -0.333***<br>(0.008)                  | -0.331***<br>(0.008)                  |
| Peer Effect                       | 0.215<br>(0.168)                      | 0.215<br>(0.168)                      | 0.156<br>(0.276)                      | 0.156<br>(0.276)                      | 0.0761<br>(0.563)                     | 0.0755<br>(0.566)                     |
| Peer Effect Status Quo            | -0.0301<br>(0.845)                    | -0.0301<br>(0.845)                    | -0.105<br>(0.461)                     | -0.105<br>(0.461)                     | -0.133<br>(0.305)                     | -0.134<br>(0.302)                     |
| Age                               |                                       |                                       | -0.00664<br>(0.137)                   | -0.00664<br>(0.137)                   | -0.00344<br>(0.399)                   | -0.00287<br>(0.484)                   |
| Income                            |                                       |                                       | -0.0440***<br>(0.003)                 | -0.0440***<br>(0.003)                 | -0.0238*<br>(0.093)                   | -0.0267*<br>(0.061)                   |
| Female                            |                                       |                                       | 0.0600<br>(0.552)                     | 0.0600<br>(0.552)                     | -0.0275<br>(0.765)                    | -0.0215<br>(0.816)                    |
| White                             |                                       |                                       | -0.117<br>(0.322)                     | -0.117<br>(0.322)                     | -0.0115<br>(0.916)                    | -0.00125<br>(0.991)                   |
| Political Scale                   |                                       |                                       | 0.619***<br>(0.000)                   | 0.619***<br>(0.000)                   | 0.439***<br>(0.000)                   | 0.440***<br>(0.000)                   |
| Education                         |                                       |                                       | -0.149***<br>(0.000)                  | -0.149***<br>(0.000)                  | -0.0551<br>(0.149)                    | -0.0659*<br>(0.091)                   |
| In full or part time employment   |                                       |                                       | 0.108<br>(0.408)                      | 0.108<br>(0.408)                      | 0.158<br>(0.182)                      | 0.144<br>(0.229)                      |
| Student                           |                                       |                                       | -0.735***<br>(0.000)                  | -0.735***<br>(0.000)                  | -0.372**<br>(0.029)                   | -0.385**<br>(0.024)                   |
| Republican                        |                                       |                                       | 0.997***<br>(0.000)                   | 0.997***<br>(0.000)                   | 0.545***<br>(0.002)                   | 0.536***<br>(0.003)                   |
| Trust in Federal Government       |                                       |                                       |                                       |                                       | -0.0575*<br>(0.056)                   | -0.0580*<br>(0.054)                   |
| Trust in State Government         |                                       |                                       |                                       |                                       | 0.0672***<br>(0.007)                  | 0.0663***<br>(0.008)                  |
| Trust in CDC                      |                                       |                                       |                                       |                                       | -0.447***<br>(0.000)                  | -0.446***<br>(0.000)                  |
| Trust in Pharmaceutical companies |                                       |                                       |                                       |                                       | -0.0405<br>(0.135)                    | -0.0408<br>(0.132)                    |
| Trust in Tech companies           |                                       |                                       |                                       |                                       | 0.0379<br>(0.177)                     | 0.0362<br>(0.196)                     |
| Frequency of travel               |                                       |                                       |                                       |                                       |                                       | 0.0538<br>(0.233)                     |
| Constant                          | 2.734***<br>(0.000)                   | 2.734***<br>(0.000)                   | 2.196***<br>(0.000)                   | 2.196***<br>(0.000)                   | 4.629***<br>(0.000)                   | 4.618***<br>(0.000)                   |
| Observations                      | 3872                                  | 3872                                  | 3697                                  | 3697                                  | 3634                                  | 3634                                  |
| Adjusted $R^2$                    | 0.001                                 | 0.001                                 | 0.199                                 | 0.199                                 | 0.333                                 | 0.333                                 |

$p$ -values in parentheses

\*  $p < 0.10$ , \*\*  $p < 0.05$ , \*\*\*  $p < 0.01$

Table S9: Determinants of agreement with the COVID pass being unfair as it poses threats to locals when people with the COVID pass travel

|                                   | (1)                             | (2)                             | (3)                             | (4)                             | (5)                             | (6)                             |
|-----------------------------------|---------------------------------|---------------------------------|---------------------------------|---------------------------------|---------------------------------|---------------------------------|
|                                   | Pass is unfair:<br>harms locals |
| Status Quo                        | -0.137<br>(0.336)               | -0.137<br>(0.336)               | -0.191<br>(0.181)               | -0.191<br>(0.181)               | -0.209<br>(0.132)               | -0.207<br>(0.137)               |
| Peer Effect                       | 0.225<br>(0.121)                | 0.225<br>(0.121)                | 0.190<br>(0.189)                | 0.190<br>(0.189)                | 0.176<br>(0.215)                | 0.175<br>(0.218)                |
| Peer Effect Status Quo            | -0.192<br>(0.185)               | -0.192<br>(0.185)               | -0.247*<br>(0.086)              | -0.247*<br>(0.086)              | -0.263*<br>(0.060)              | -0.264*<br>(0.059)              |
| Age                               |                                 |                                 | -0.0191***<br>(0.000)           | -0.0191***<br>(0.000)           | -0.0186***<br>(0.000)           | -0.0180***<br>(0.000)           |
| Income                            |                                 |                                 | -0.0270*<br>(0.090)             | -0.0270*<br>(0.090)             | -0.0165<br>(0.298)              | -0.0195<br>(0.220)              |
| Female                            |                                 |                                 | 0.121<br>(0.242)                | 0.121<br>(0.242)                | 0.0635<br>(0.529)               | 0.0696<br>(0.492)               |
| White                             |                                 |                                 | -0.284**<br>(0.019)             | -0.284**<br>(0.019)             | -0.215*<br>(0.072)              | -0.205*<br>(0.087)              |
| Political Scale                   |                                 |                                 | 0.264***<br>(0.000)             | 0.264***<br>(0.000)             | 0.173***<br>(0.000)             | 0.174***<br>(0.000)             |
| Education                         |                                 |                                 | -0.0504<br>(0.242)              | -0.0504<br>(0.242)              | -0.00632<br>(0.883)             | -0.0176<br>(0.693)              |
| In full or part time employment   |                                 |                                 | -0.118<br>(0.386)               | -0.118<br>(0.386)               | -0.0896<br>(0.502)              | -0.104<br>(0.439)               |
| Student                           |                                 |                                 | -0.580***<br>(0.004)            | -0.580***<br>(0.004)            | -0.353*<br>(0.079)              | -0.366*<br>(0.070)              |
| Republican                        |                                 |                                 | 0.788***<br>(0.000)             | 0.788***<br>(0.000)             | 0.498***<br>(0.006)             | 0.488***<br>(0.007)             |
| Trust in Federal Government       |                                 |                                 |                                 |                                 | 0.0133<br>(0.708)               | 0.0127<br>(0.719)               |
| Trust in State Government         |                                 |                                 |                                 |                                 | 0.0427<br>(0.152)               | 0.0417<br>(0.162)               |
| Trust in CDC                      |                                 |                                 |                                 |                                 | -0.283***<br>(0.000)            | -0.282***<br>(0.000)            |
| Trust in Pharmaceutical companies |                                 |                                 |                                 |                                 | -0.0734**<br>(0.013)            | -0.0735**<br>(0.013)            |
| Trust in Tech companies           |                                 |                                 |                                 |                                 | 0.0402<br>(0.186)               | 0.0384<br>(0.206)               |
| Frequency of travel               |                                 |                                 |                                 |                                 |                                 | 0.0552<br>(0.261)               |
| Constant                          | 3.684***<br>(0.000)             | 3.684***<br>(0.000)             | 4.233***<br>(0.000)             | 4.233***<br>(0.000)             | 5.749***<br>(0.000)             | 5.739***<br>(0.000)             |
| Observations                      | 3912                            | 3912                            | 3732                            | 3732                            | 3664                            | 3664                            |
| Adjusted $R^2$                    | 0.002                           | 0.002                           | 0.053                           | 0.053                           | 0.108                           | 0.108                           |

$p$ -values in parentheses

\*  $p < 0.10$ , \*\*  $p < 0.05$ , \*\*\*  $p < 0.01$

Table S10: Determinants of agreement with forging a COVID pass being easy

|                                   | (1)                 | (2)                 | (3)                  | (4)                  | (5)                  | (6)                  |
|-----------------------------------|---------------------|---------------------|----------------------|----------------------|----------------------|----------------------|
|                                   | Forging<br>concerns | Forging<br>concerns | Forging<br>concerns  | Forging<br>concerns  | Forging<br>concerns  | Forging<br>concerns  |
| Status Quo                        | -0.0786<br>(0.554)  | -0.0786<br>(0.554)  | -0.0837<br>(0.526)   | -0.0837<br>(0.526)   | -0.0830<br>(0.523)   | -0.0900<br>(0.488)   |
| Peer Effect                       | 0.00288<br>(0.983)  | 0.00288<br>(0.983)  | -0.0669<br>(0.619)   | -0.0669<br>(0.619)   | -0.0613<br>(0.643)   | -0.0582<br>(0.660)   |
| Peer Effect Status Quo            | -0.214<br>(0.112)   | -0.214<br>(0.112)   | -0.247*<br>(0.066)   | -0.247*<br>(0.066)   | -0.225*<br>(0.089)   | -0.221*<br>(0.094)   |
| Age                               |                     |                     | 0.0190***<br>(0.000) | 0.0190***<br>(0.000) | 0.0244***<br>(0.000) | 0.0227***<br>(0.000) |
| Income                            |                     |                     | 0.0166<br>(0.258)    | 0.0166<br>(0.258)    | 0.0314**<br>(0.033)  | 0.0400***<br>(0.007) |
| Female                            |                     |                     | 0.477***<br>(0.000)  | 0.477***<br>(0.000)  | 0.415***<br>(0.000)  | 0.397***<br>(0.000)  |
| White                             |                     |                     | -0.127<br>(0.261)    | -0.127<br>(0.261)    | -0.172<br>(0.124)    | -0.202*<br>(0.071)   |
| Political Scale                   |                     |                     | 0.252***<br>(0.000)  | 0.252***<br>(0.000)  | 0.223***<br>(0.000)  | 0.220***<br>(0.000)  |
| Education                         |                     |                     | -0.143***<br>(0.000) | -0.143***<br>(0.000) | -0.0981**<br>(0.011) | -0.0670*<br>(0.092)  |
| In full or part time employment   |                     |                     | -0.141<br>(0.249)    | -0.141<br>(0.249)    | -0.0949<br>(0.435)   | -0.0565<br>(0.644)   |
| Student                           |                     |                     | -0.0336<br>(0.854)   | -0.0336<br>(0.854)   | 0.147<br>(0.422)     | 0.183<br>(0.321)     |
| Republican                        |                     |                     | 0.0119<br>(0.940)    | 0.0119<br>(0.940)    | -0.0407<br>(0.793)   | -0.0145<br>(0.925)   |
| Trust in Federal Government       |                     |                     |                      |                      | -0.0829**<br>(0.014) | -0.0816**<br>(0.016) |
| Trust in State Government         |                     |                     |                      |                      | -0.0259<br>(0.355)   | -0.0230<br>(0.411)   |
| Trust in CDC                      |                     |                     |                      |                      | -0.0408<br>(0.102)   | -0.0437*<br>(0.079)  |
| Trust in Pharmaceutical companies |                     |                     |                      |                      | -0.116***<br>(0.000) | -0.116***<br>(0.000) |
| Trust in Tech companies           |                     |                     |                      |                      | 0.0101<br>(0.716)    | 0.0150<br>(0.591)    |
| Frequency of travel               |                     |                     |                      |                      |                      | -0.153***<br>(0.001) |
| Constant                          | 5.952***<br>(0.000) | 5.952***<br>(0.000) | 5.082***<br>(0.000)  | 5.082***<br>(0.000)  | 5.755***<br>(0.000)  | 5.784***<br>(0.000)  |
| Observations                      | 3972                | 3972                | 3784                 | 3784                 | 3703                 | 3703                 |
| Adjusted $R^2$                    | 0.000               | 0.000               | 0.046                | 0.046                | 0.084                | 0.086                |

 $p$ -values in parentheses\*  $p < 0.10$ , \*\*  $p < 0.05$ , \*\*\*  $p < 0.01$

Table S11: Determinants of agreement with the COVID inducing more vaccinations

|                                   | (1)                          | (2)                          | (3)                          | (4)                          | (5)                          | (6)                          |
|-----------------------------------|------------------------------|------------------------------|------------------------------|------------------------------|------------------------------|------------------------------|
|                                   | Pass induces<br>vaccinations |
| Status Quo                        | 0.0906<br>(0.467)            | 0.0906<br>(0.467)            | 0.106<br>(0.398)             | 0.106<br>(0.398)             | 0.103<br>(0.384)             | 0.107<br>(0.362)             |
| Peer Effect                       | 0.0172<br>(0.893)            | 0.0172<br>(0.893)            | 0.0205<br>(0.873)            | 0.0205<br>(0.873)            | 0.0332<br>(0.782)            | 0.0308<br>(0.797)            |
| Peer Effect Status Quo            | 0.194<br>(0.118)             | 0.194<br>(0.118)             | 0.222*<br>(0.073)            | 0.222*<br>(0.073)            | 0.174<br>(0.135)             | 0.170<br>(0.141)             |
| Age                               |                              |                              | -0.0101**<br>(0.012)         | -0.0101**<br>(0.012)         | -0.0144***<br>(0.000)        | -0.0131***<br>(0.000)        |
| Income                            |                              |                              | 0.00840<br>(0.541)           | 0.00840<br>(0.541)           | -0.0156<br>(0.232)           | -0.0224*<br>(0.087)          |
| Female                            |                              |                              | -0.199**<br>(0.029)          | -0.199**<br>(0.029)          | -0.105<br>(0.216)            | -0.0913<br>(0.284)           |
| White                             |                              |                              | -0.326***<br>(0.002)         | -0.326***<br>(0.002)         | -0.336***<br>(0.001)         | -0.312***<br>(0.002)         |
| Political Scale                   |                              |                              | -0.189***<br>(0.000)         | -0.189***<br>(0.000)         | -0.0875***<br>(0.001)        | -0.0849***<br>(0.002)        |
| Education                         |                              |                              | 0.0826**<br>(0.027)          | 0.0826**<br>(0.027)          | 0.00511<br>(0.885)           | -0.0194<br>(0.593)           |
| In full or part time employment   |                              |                              | 0.112<br>(0.345)             | 0.112<br>(0.345)             | 0.00918<br>(0.934)           | -0.0213<br>(0.849)           |
| Student                           |                              |                              | 0.559***<br>(0.001)          | 0.559***<br>(0.001)          | 0.240<br>(0.152)             | 0.211<br>(0.208)             |
| Republican                        |                              |                              | -0.355**<br>(0.030)          | -0.355**<br>(0.030)          | 0.00467<br>(0.974)           | -0.0169<br>(0.907)           |
| Trust in Federal Government       |                              |                              |                              |                              | 0.0735**<br>(0.018)          | 0.0726**<br>(0.019)          |
| Trust in State Government         |                              |                              |                              |                              | 0.00468<br>(0.858)           | 0.00235<br>(0.928)           |
| Trust in CDC                      |                              |                              |                              |                              | 0.253***<br>(0.000)          | 0.255***<br>(0.000)          |
| Trust in Pharmaceutical companies |                              |                              |                              |                              | 0.0397<br>(0.133)            | 0.0395<br>(0.136)            |
| Trust in Tech companies           |                              |                              |                              |                              | 0.0840***<br>(0.002)         | 0.0802***<br>(0.003)         |
| Frequency of travel               |                              |                              |                              |                              |                              | 0.121***<br>(0.003)          |
| Constant                          | 6.098***<br>(0.000)          | 6.098***<br>(0.000)          | 6.801***<br>(0.000)          | 6.801***<br>(0.000)          | 4.858***<br>(0.000)          | 4.837***<br>(0.000)          |
| Observations                      | 3967                         | 3967                         | 3779                         | 3779                         | 3701                         | 3701                         |
| Adjusted $R^2$                    | -0.000                       | -0.000                       | 0.044                        | 0.044                        | 0.177                        | 0.179                        |

 $p$ -values in parentheses\*  $p < 0.10$ , \*\*  $p < 0.05$ , \*\*\*  $p < 0.01$

Table S12: Determinants of agreement with requiring a COVID pass for international flights

|                                   | (1)<br>Pass required on<br>international flights | (2)<br>Pass required on<br>international flights | (3)<br>Pass required on<br>international flights | (4)<br>Pass required on<br>international flights | (5)<br>Pass required on<br>international flights | (6)<br>Pass required on<br>international flights |
|-----------------------------------|--------------------------------------------------|--------------------------------------------------|--------------------------------------------------|--------------------------------------------------|--------------------------------------------------|--------------------------------------------------|
| Status Quo                        | 0.206<br>(0.190)                                 | 0.206<br>(0.190)                                 | 0.281*<br>(0.062)                                | 0.281*<br>(0.062)                                | 0.302**<br>(0.025)                               | 0.305**<br>(0.024)                               |
| Peer Effect                       | 0.251<br>(0.115)                                 | 0.251<br>(0.115)                                 | 0.249<br>(0.105)                                 | 0.249<br>(0.105)                                 | 0.303**<br>(0.027)                               | 0.302**<br>(0.027)                               |
| Peer Effect Status Quo            | 0.357**<br>(0.025)                               | 0.357**<br>(0.025)                               | 0.386**<br>(0.011)                               | 0.386**<br>(0.011)                               | 0.363***<br>(0.008)                              | 0.361***<br>(0.008)                              |
| Age                               |                                                  |                                                  | 0.0144***<br>(0.003)                             | 0.0144***<br>(0.003)                             | 0.0105**<br>(0.014)                              | 0.0112**<br>(0.009)                              |
| Income                            |                                                  |                                                  | 0.0301*<br>(0.072)                               | 0.0301*<br>(0.072)                               | -0.00224<br>(0.883)                              | -0.00585<br>(0.703)                              |
| Female                            |                                                  |                                                  | -0.0625<br>(0.566)                               | -0.0625<br>(0.566)                               | 0.0570<br>(0.557)                                | 0.0644<br>(0.507)                                |
| White                             |                                                  |                                                  | -0.185<br>(0.145)                                | -0.185<br>(0.145)                                | -0.212*<br>(0.063)                               | -0.200*<br>(0.082)                               |
| Political Scale                   |                                                  |                                                  | -0.561***<br>(0.000)                             | -0.561***<br>(0.000)                             | -0.376***<br>(0.000)                             | -0.374***<br>(0.000)                             |
| Education                         |                                                  |                                                  | 0.127***<br>(0.004)                              | 0.127***<br>(0.004)                              | 0.0214<br>(0.595)                                | 0.00835<br>(0.840)                               |
| In full or part time employment   |                                                  |                                                  | -0.0419<br>(0.769)                               | -0.0419<br>(0.769)                               | -0.124<br>(0.323)                                | -0.140<br>(0.268)                                |
| Student                           |                                                  |                                                  | 0.471**<br>(0.022)                               | 0.471**<br>(0.022)                               | 0.0659<br>(0.729)                                | 0.0507<br>(0.791)                                |
| Republican                        |                                                  |                                                  | -0.758***<br>(0.000)                             | -0.758***<br>(0.000)                             | -0.249<br>(0.137)                                | -0.260<br>(0.120)                                |
| Trust in Federal Government       |                                                  |                                                  |                                                  |                                                  | 0.127***<br>(0.000)                              | 0.126***<br>(0.000)                              |
| Trust in State Government         |                                                  |                                                  |                                                  |                                                  | -0.0678**<br>(0.012)                             | -0.0691**<br>(0.011)                             |
| Trust in CDC                      |                                                  |                                                  |                                                  |                                                  | 0.467***<br>(0.000)                              | 0.469***<br>(0.000)                              |
| Trust in Pharmaceutical companies |                                                  |                                                  |                                                  |                                                  | 0.0796***<br>(0.006)                             | 0.0794***<br>(0.006)                             |
| Trust in Tech companies           |                                                  |                                                  |                                                  |                                                  | 0.00634<br>(0.833)                               | 0.00427<br>(0.887)                               |
| Frequency of travel               |                                                  |                                                  |                                                  |                                                  |                                                  | 0.0642<br>(0.179)                                |
| Constant                          | 6.101***<br>(0.000)                              | 6.101***<br>(0.000)                              | 6.556***<br>(0.000)                              | 6.556***<br>(0.000)                              | 3.451***<br>(0.000)                              | 3.439***<br>(0.000)                              |
| Observations                      | 3951                                             | 3951                                             | 3763                                             | 3763                                             | 3693                                             | 3693                                             |
| Adjusted $R^2$                    | 0.001                                            | 0.001                                            | 0.134                                            | 0.134                                            | 0.325                                            | 0.326                                            |

p-values in parentheses  
\*  $p < 0.10$ , \*\*  $p < 0.05$ , \*\*\*  $p < 0.01$

Table S13: Determinants of agreement with intentionally getting infected with COVID to obtain the COVID pass

|                                   | (1)                                    | (2)                                    | (3)                                    | (4)                                    | (5)                                    | (6)                                    |
|-----------------------------------|----------------------------------------|----------------------------------------|----------------------------------------|----------------------------------------|----------------------------------------|----------------------------------------|
|                                   | Pass induces<br>intentional infections |
| Status Quo                        | 0.0169<br>(0.826)                      | 0.0169<br>(0.826)                      | 0.0341<br>(0.656)                      | 0.0341<br>(0.656)                      | 0.0234<br>(0.760)                      | 0.0314<br>(0.681)                      |
| Peer Effect                       | -0.0284<br>(0.705)                     | -0.0284<br>(0.705)                     | -0.00272<br>(0.971)                    | -0.00272<br>(0.971)                    | -0.00731<br>(0.921)                    | -0.00942<br>(0.897)                    |
| Peer Effect Status Quo            | -0.0197<br>(0.796)                     | -0.0197<br>(0.796)                     | 0.0167<br>(0.826)                      | 0.0167<br>(0.826)                      | 0.00688<br>(0.928)                     | 0.00459<br>(0.951)                     |
| Age                               |                                        |                                        | -0.0109***<br>(0.000)                  | -0.0109***<br>(0.000)                  | -0.0120***<br>(0.000)                  | -0.0102***<br>(0.000)                  |
| Income                            |                                        |                                        | -0.0145*<br>(0.077)                    | -0.0145*<br>(0.077)                    | -0.0191**<br>(0.022)                   | -0.0281***<br>(0.001)                  |
| Female                            |                                        |                                        | -0.118**<br>(0.031)                    | -0.118**<br>(0.031)                    | -0.114**<br>(0.036)                    | -0.0957*<br>(0.077)                    |
| White                             |                                        |                                        | -0.0790<br>(0.225)                     | -0.0790<br>(0.225)                     | -0.0539<br>(0.416)                     | -0.0229<br>(0.730)                     |
| Political Scale                   |                                        |                                        | 0.0887***<br>(0.000)                   | 0.0887***<br>(0.000)                   | 0.0732***<br>(0.000)                   | 0.0758***<br>(0.000)                   |
| Education                         |                                        |                                        | 0.0645***<br>(0.005)                   | 0.0645***<br>(0.005)                   | 0.0546**<br>(0.018)                    | 0.0220<br>(0.349)                      |
| In full or part time employment   |                                        |                                        | 0.236***<br>(0.000)                    | 0.236***<br>(0.000)                    | 0.233***<br>(0.000)                    | 0.191***<br>(0.001)                    |
| Student                           |                                        |                                        | 0.0576<br>(0.514)                      | 0.0576<br>(0.514)                      | 0.0708<br>(0.432)                      | 0.0332<br>(0.714)                      |
| Republican                        |                                        |                                        | 0.0366<br>(0.740)                      | 0.0366<br>(0.740)                      | 0.0392<br>(0.725)                      | 0.0133<br>(0.904)                      |
| Trust in Federal Government       |                                        |                                        |                                        |                                        | 0.0305<br>(0.116)                      | 0.0294<br>(0.129)                      |
| Trust in State Government         |                                        |                                        |                                        |                                        | 0.00308<br>(0.810)                     | 0.0000730<br>(0.995)                   |
| Trust in CDC                      |                                        |                                        |                                        |                                        | -0.0483***<br>(0.001)                  | -0.0455***<br>(0.001)                  |
| Trust in Pharmaceutical companies |                                        |                                        |                                        |                                        | 0.0271*<br>(0.087)                     | 0.0266*<br>(0.090)                     |
| Trust in Tech companies           |                                        |                                        |                                        |                                        | 0.0461***<br>(0.002)                   | 0.0410***<br>(0.005)                   |
| Frequency of travel               |                                        |                                        |                                        |                                        |                                        | 0.161***<br>(0.000)                    |
| Constant                          | 0.577***<br>(0.000)                    | 0.577***<br>(0.000)                    | 0.466***<br>(0.001)                    | 0.466***<br>(0.001)                    | 0.477***<br>(0.002)                    | 0.445***<br>(0.003)                    |
| Observations                      | 3784                                   | 3784                                   | 3624                                   | 3624                                   | 3579                                   | 3579                                   |
| Adjusted $R^2$                    | -0.001                                 | -0.001                                 | 0.025                                  | 0.025                                  | 0.037                                  | 0.047                                  |

p-values in parentheses

\*  $p < 0.10$ , \*\*  $p < 0.05$ , \*\*\*  $p < 0.01$

Table S14: Determinants of agreement with the COVID pass having greater pros than cons

|                                   | (1)                 | (2)                 | (3)                  | (4)                  | (5)                  | (6)                  |
|-----------------------------------|---------------------|---------------------|----------------------|----------------------|----------------------|----------------------|
|                                   | Pros outweigh cons  | Pros outweigh cons  | Pros outweigh cons   | Pros outweigh cons   | Pros outweigh cons   | Pros outweigh cons   |
| Status Quo                        | 0.412***<br>(0.005) | 0.412***<br>(0.005) | 0.459***<br>(0.001)  | 0.459***<br>(0.001)  | 0.491***<br>(0.000)  | 0.494***<br>(0.000)  |
| Peer Effect                       | 0.146<br>(0.336)    | 0.146<br>(0.336)    | 0.154<br>(0.285)     | 0.154<br>(0.285)     | 0.242*<br>(0.054)    | 0.240*<br>(0.055)    |
| Peer Effect Status Quo            | 0.514***<br>(0.001) | 0.514***<br>(0.001) | 0.587***<br>(0.000)  | 0.587***<br>(0.000)  | 0.593***<br>(0.000)  | 0.592***<br>(0.000)  |
| Age                               |                     |                     | 0.0155***<br>(0.001) | 0.0155***<br>(0.001) | 0.0120***<br>(0.002) | 0.0127***<br>(0.001) |
| Income                            |                     |                     | 0.0520***<br>(0.001) | 0.0520***<br>(0.001) | 0.0242*<br>(0.077)   | 0.0205<br>(0.135)    |
| Female                            |                     |                     | -0.138<br>(0.170)    | -0.138<br>(0.170)    | -0.0407<br>(0.644)   | -0.0332<br>(0.707)   |
| White                             |                     |                     | 0.0761<br>(0.515)    | 0.0761<br>(0.515)    | -0.0180<br>(0.863)   | -0.00516<br>(0.961)  |
| Political Scale                   |                     |                     | -0.551***<br>(0.000) | -0.551***<br>(0.000) | -0.362***<br>(0.000) | -0.360***<br>(0.000) |
| Education                         |                     |                     | 0.201***<br>(0.000)  | 0.201***<br>(0.000)  | 0.0985***<br>(0.007) | 0.0850**<br>(0.024)  |
| In full or part time employment   |                     |                     | -0.129<br>(0.328)    | -0.129<br>(0.328)    | -0.211*<br>(0.061)   | -0.228**<br>(0.045)  |
| Student                           |                     |                     | 0.605***<br>(0.001)  | 0.605***<br>(0.001)  | 0.197<br>(0.238)     | 0.182<br>(0.279)     |
| Republican                        |                     |                     | -1.076***<br>(0.000) | -1.076***<br>(0.000) | -0.540***<br>(0.001) | -0.551***<br>(0.000) |
| Trust in Federal Government       |                     |                     |                      |                      | 0.0899***<br>(0.003) | 0.0894***<br>(0.003) |
| Trust in State Government         |                     |                     |                      |                      | -0.0315<br>(0.210)   | -0.0327<br>(0.192)   |
| Trust in CDC                      |                     |                     |                      |                      | 0.490***<br>(0.000)  | 0.491***<br>(0.000)  |
| Trust in Pharmaceutical companies |                     |                     |                      |                      | 0.0382<br>(0.155)    | 0.0381<br>(0.156)    |
| Trust in Tech companies           |                     |                     |                      |                      | 0.0106<br>(0.689)    | 0.00843<br>(0.751)   |
| Frequency of travel               |                     |                     |                      |                      |                      | 0.0659<br>(0.125)    |
| Constant                          | 6.378***<br>(0.000) | 6.378***<br>(0.000) | 6.252***<br>(0.000)  | 6.252***<br>(0.000)  | 3.103***<br>(0.000)  | 3.091***<br>(0.000)  |
| Observations                      | 3942                | 3942                | 3756                 | 3756                 | 3690                 | 3690                 |
| Adjusted $R^2$                    | 0.003               | 0.003               | 0.174                | 0.174                | 0.381                | 0.381                |

*p*-values in parentheses  
\*  $p < 0.10$ , \*\*  $p < 0.05$ , \*\*\*  $p < 0.01$



### 3. Post-hoc tests: treatments vs control

Pairwise comparisons of means with equal variances

over : group\_no

|          | Number of Comparisons |
|----------|-----------------------|
| group_no | 3                     |

| pass_importance        | Contrast | Std. Err. | Dunnett<br>t | Dunnett<br>P> t | Dunnett<br>[95% Conf. Interval] |
|------------------------|----------|-----------|--------------|-----------------|---------------------------------|
| group_no               |          |           |              |                 |                                 |
| Status Quo vs Control  | .4780176 | .1498593  | 3.19         | 0.004           | .1259988 .8300364               |
| Peer Effect vs Control | .4488686 | .1500478  | 2.99         | 0.008           | .0964072 .80133                 |
| PE + SQ vs Control     | .6649899 | .1499722  | 4.43         | 0.000           | .312706 1.017274                |

. pwmean pass\_preventspread, over(group\_no) mcompare(dunnett) effects

Pairwise comparisons of means with equal variances

over : group\_no

|          | Number of Comparisons |
|----------|-----------------------|
| group_no | 3                     |

| pass_preventspread     | Contrast | Std. Err. | Dunnett<br>t | Dunnett<br>P> t | Dunnett<br>[95% Conf. Interval] |
|------------------------|----------|-----------|--------------|-----------------|---------------------------------|
| group_no               |          |           |              |                 |                                 |
| Status Quo vs Control  | .32639   | .1521134  | 2.15         | 0.082           | -.0309235 .6837036              |
| Peer Effect vs Control | .4444529 | .1523045  | 2.92         | 0.010           | .0866903 .8022155               |
| PE + SQ vs Control     | .7871948 | .1523045  | 5.17         | 0.000           | .4294323 1.144957               |

```
. pwmean pass_normalcy, over(group_no) mcompare(dunnett) effects
```

Pairwise comparisons of means with equal variances

```
over          : group_no
```

|          | Number of Comparisons |
|----------|-----------------------|
| group_no | 3                     |

| pass_normalcy          | Contrast | Std. Err. | Dunnett |       | Dunnett              |          |
|------------------------|----------|-----------|---------|-------|----------------------|----------|
|                        |          |           | t       | P> t  | [95% Conf. Interval] |          |
| group_no               |          |           |         |       |                      |          |
| Status Quo vs Control  | .4092068 | .1514514  | 2.70    | 0.019 | .0534481             | .7649654 |
| Peer Effect vs Control | .395241  | .1514898  | 2.61    | 0.025 | .0393922             | .7510898 |
| PE + SQ vs Control     | .737457  | .1513749  | 4.87    | 0.000 | .381878              | 1.093036 |

```
. pwmean pass_limitliberty, over(group_no) mcompare(dunnett) effects
```

Pairwise comparisons of means with equal variances

```
over          : group_no
```

|          | Number of Comparisons |
|----------|-----------------------|
| group_no | 3                     |

| pass_limitliberty      | Contrast  | Std. Err. | Dunnett |       | Dunnett              |           |
|------------------------|-----------|-----------|---------|-------|----------------------|-----------|
|                        |           |           | t       | P> t  | [95% Conf. Interval] |           |
| group_no               |           |           |         |       |                      |           |
| Status Quo vs Control  | -.3721272 | .1554656  | -2.39   | 0.045 | -.7373151            | -.0069392 |
| Peer Effect vs Control | .0294156  | .1555052  | 0.19    | 0.995 | -.3358655            | .3946967  |
| PE + SQ vs Control     | -.3833839 | .1563135  | -2.45   | 0.038 | -.7505634            | -.0162043 |

```
. pwmean pass_socialfabric, over(group_no) mcompare(dunnett) effects
```

Pairwise comparisons of means with equal variances

```
over          : group_no
```

|          | Number of<br>Comparisons |
|----------|--------------------------|
| group_no | 3                        |

| pass_socialfabric      | Contrast  | Std. Err. | Dunnett |       | Dunnett              |           |
|------------------------|-----------|-----------|---------|-------|----------------------|-----------|
|                        |           |           | t       | P> t  | [95% Conf. Interval] |           |
| group_no               |           |           |         |       |                      |           |
| Status Quo vs Control  | -.2797201 | .1503161  | -1.86   | 0.155 | -.632812             | .0733717  |
| Peer Effect vs Control | -.0688592 | .1502775  | -0.46   | 0.941 | -.4218602            | .2841418  |
| PE + SQ vs Control     | -.4682747 | .1507854  | -3.11   | 0.005 | -.8224688            | -.1140806 |

```
. pwmean pass_privacy, over(group_no) mcompare(dunnett) effects
```

Pairwise comparisons of means with equal variances

```
over          : group_no
```

|          | Number of<br>Comparisons |
|----------|--------------------------|
| group_no | 3                        |

| pass_privacy           | Contrast  | Std. Err. | Dunnett |       | Dunnett              |          |
|------------------------|-----------|-----------|---------|-------|----------------------|----------|
|                        |           |           | t       | P> t  | [95% Conf. Interval] |          |
| group_no               |           |           |         |       |                      |          |
| Status Quo vs Control  | -.3241938 | .1523358  | -2.13   | 0.086 | -.6820299            | .0336423 |
| Peer Effect vs Control | -.0403011 | .1520241  | -0.27   | 0.987 | -.397405             | .3168029 |
| PE + SQ vs Control     | -.3484439 | .1527718  | -2.28   | 0.059 | -.7073042            | .0104163 |

```
. pwmean pass_unfair_travel, over(group_no) mcompare(dunnett) effects
```

Pairwise comparisons of means with equal variances

```
over          : group_no
```

|          | Number of<br>Comparisons |
|----------|--------------------------|
| group_no | 3                        |

| pass_unfair_travel     | Contrast  | Std. Err. | Dunnett |       | Dunnett              |          |
|------------------------|-----------|-----------|---------|-------|----------------------|----------|
|                        |           |           | t       | P> t  | [95% Conf. Interval] |          |
| group_no               |           |           |         |       |                      |          |
| Status Quo vs Control  | -.2232949 | .1530898  | -1.46   | 0.328 | -.5829021            | .1363123 |
| Peer Effect vs Control | .2153462  | .1532478  | 1.41    | 0.358 | -.1446321            | .5753245 |
| PE + SQ vs Control     | -.0301113 | .1537692  | -0.20   | 0.995 | -.3913145            | .3310918 |

```
. pwmean pass_unfair_harmlocals, over(group_no) mcompare(dunnett) effects
```

Pairwise comparisons of means with equal variances

```
over          : group_no
```

|          | Number of<br>Comparisons |
|----------|--------------------------|
| group_no | 3                        |

| pass_unfair_harmlocals | Contrast  | Std. Err. | Dunnett |       | Dunnett              |          |
|------------------------|-----------|-----------|---------|-------|----------------------|----------|
|                        |           |           | t       | P> t  | [95% Conf. Interval] |          |
| group_no               |           |           |         |       |                      |          |
| Status Quo vs Control  | -.1371456 | .1448321  | -0.95   | 0.662 | -.4773555            | .2030643 |
| Peer Effect vs Control | .2254693  | .1448321  | 1.56    | 0.277 | -.1147405            | .5656792 |
| PE + SQ vs Control     | -.1923754 | .1451307  | -1.33   | 0.405 | -.5332868            | .1485359 |

```
. pwmean pass_forge, over(group_no) mcompare(dunnett) effects
```

Pairwise comparisons of means with equal variances

```
over      : group_no
```

|          | Number of Comparisons |
|----------|-----------------------|
| group_no | 3                     |

| pass_forge             | Contrast  | Std. Err. | Dunnett<br>t | P> t  | Dunnett<br>[95% Conf. Interval] |
|------------------------|-----------|-----------|--------------|-------|---------------------------------|
| group_no               |           |           |              |       |                                 |
| Status Quo vs Control  | -.0785678 | .1329817  | -0.59        | 0.885 | -.3909411 .2338055              |
| Peer Effect vs Control | .0028756  | .1330152  | 0.02         | 1.000 | -.3095765 .3153276              |
| PE + SQ vs Control     | -.2136879 | .1331498  | -1.60        | 0.254 | -.5264562 .0990804              |

```
. pwmean pass_inducevaccine, over(group_no) mcompare(dunnett) effects
```

Pairwise comparisons of means with equal variances

```
over      : group_no
```

|          | Number of Comparisons |
|----------|-----------------------|
| group_no | 3                     |

| pass_inducevaccine     | Contrast | Std. Err. | Dunnett<br>t | P> t  | Dunnett<br>[95% Conf. Interval] |
|------------------------|----------|-----------|--------------|-------|---------------------------------|
| group_no               |          |           |              |       |                                 |
| Status Quo vs Control  | .0906344 | .1259279  | 0.72         | 0.813 | -.2051696 .3864384              |
| Peer Effect vs Control | .0172356 | .1259596  | 0.14         | 0.998 | -.278643 .3131141               |
| PE + SQ vs Control     | .1935194 | .1260552  | 1.54         | 0.288 | -.1025835 .4896224              |

```
. pwmean pass_flightsinter, over(group_no) mcompare(dunnett) effects
```

Pairwise comparisons of means with equal variances

```
over      : group_no
```

|          | Number of Comparisons |
|----------|-----------------------|
| group_no | 3                     |

| pass_flightsinter      | Contrast | Std. Err. | Dunnett<br>t | Dunnett<br>P> t | Dunnett<br>[95% Conf. Interval] |
|------------------------|----------|-----------|--------------|-----------------|---------------------------------|
| group_no               |          |           |              |                 |                                 |
| Status Quo vs Control  | .2059544 | .1581997  | 1.30         | 0.420           | -.1656558 .5775646              |
| Peer Effect vs Control | .2508196 | .1584809  | 1.58         | 0.265           | -.1214513 .6230904              |
| PE + SQ vs Control     | .3565106 | .1584809  | 2.25         | 0.064           | -.0157602 .7287815              |

```
. pwmean pass_intentionalinfection, over(group_no) mcompare(dunnett) effects
```

Pairwise comparisons of means with equal variances

```
over      : group_no
```

|          | Number of Comparisons |
|----------|-----------------------|
| group_no | 3                     |

| pass_intentionalinfec~n | Contrast  | Std. Err. | Dunnett<br>t | Dunnett<br>P> t | Dunnett<br>[95% Conf. Interval] |
|-------------------------|-----------|-----------|--------------|-----------------|---------------------------------|
| group_no                |           |           |              |                 |                                 |
| Status Quo vs Control   | .0168776  | .0753055  | 0.22         | 0.992           | -.1600146 .1937698              |
| Peer Effect vs Control  | -.0283784 | .0753453  | -0.38        | 0.965           | -.2053641 .1486072              |
| PE + SQ vs Control      | -.0196794 | .0754253  | -0.26        | 0.988           | -.196853 .1574943               |

```
. pwmean pass_proscons, over(group_no) mcompare(dunnett) effects
```

Pairwise comparisons of means with equal variances

```
over          : group_no
```

|          | Number of Comparisons |
|----------|-----------------------|
| group_no | 3                     |

| pass_proscons          | Contrast | Std. Err. | Dunnett |       | Dunnett              |          |
|------------------------|----------|-----------|---------|-------|----------------------|----------|
|                        |          |           | t       | P> t  | [95% Conf. Interval] |          |
| group_no               |          |           |         |       |                      |          |
| Status Quo vs Control  | .4123174 | .1497878  | 2.75    | 0.016 | .0604666             | .7641681 |
| Peer Effect vs Control | .1463275 | .1497878  | 0.98    | 0.641 | -.2055232            | .4981782 |
| PE + SQ vs Control     | .5137298 | .1498259  | 3.43    | 0.002 | .1617895             | .8656701 |

```
. pwmean f1, over(group_no) mcompare(dunnett) effects
```

Pairwise comparisons of means with equal variances

```
over          : group_no
```

|          | Number of Comparisons |
|----------|-----------------------|
| group_no | 3                     |

| f1                     | Contrast | Std. Err. | Dunnett |       | Dunnett              |          |
|------------------------|----------|-----------|---------|-------|----------------------|----------|
|                        |          |           | t       | P> t  | [95% Conf. Interval] |          |
| group_no               |          |           |         |       |                      |          |
| Status Quo vs Control  | .1188021 | .0460448  | 2.58    | 0.027 | .0106432             | .226961  |
| Peer Effect vs Control | .053496  | .0459561  | 1.16    | 0.510 | -.0544547            | .1614467 |
| PE + SQ vs Control     | .1414529 | .0460959  | 3.07    | 0.006 | .0331738             | .2497321 |



```
. pwmean pass_importance, over(treatments) mcompare(dunnett) effects
```

Pairwise comparisons of means with equal variances

```
over          : treatments
```

|            | Number of Comparisons |
|------------|-----------------------|
| treatments | 2                     |

| pass_importance        | Contrast  | Std. Err. | Dunnett<br>t | P> t  | Dunnett<br>[95% Conf. Interval] |
|------------------------|-----------|-----------|--------------|-------|---------------------------------|
| treatments             |           |           |              |       |                                 |
| Status Quo vs PE + SQ  | -.1869724 | .1500105  | -1.25        | 0.353 | -.5188154 .1448706              |
| Peer Effect vs PE + SQ | -.2161213 | .1501992  | -1.44        | 0.257 | -.5483816 .1161389              |

```
. pwmean pass_preventspread, over(treatments) mcompare(dunnett) effects
```

Pairwise comparisons of means with equal variances

```
over          : treatments
```

|            | Number of Comparisons |
|------------|-----------------------|
| treatments | 2                     |

| pass_preventspread     | Contrast  | Std. Err. | Dunnett<br>t | P> t  | Dunnett<br>[95% Conf. Interval] |
|------------------------|-----------|-----------|--------------|-------|---------------------------------|
| treatments             |           |           |              |       |                                 |
| Status Quo vs PE + SQ  | -.4608048 | .1522443  | -3.03        | 0.005 | -.7975893 -.1240203             |
| Peer Effect vs PE + SQ | -.3427419 | .1524356  | -2.25        | 0.046 | -.6799495 -.0055344             |

```
. pwmean pass_normalcy, over(treatments) mcompare(dunnett) effects
```

Pairwise comparisons of means with equal variances

```
over          : treatments
```

|            | Number of Comparisons |
|------------|-----------------------|
| treatments | 2                     |

| pass_normalcy          | Contrast  | Std. Err. | Dunnett<br>t | P> t  | Dunnett<br>[95% Conf. Interval] |
|------------------------|-----------|-----------|--------------|-------|---------------------------------|
| treatments             |           |           |              |       |                                 |
| Status Quo vs PE + SQ  | -.3282502 | .1511233  | -2.17        | 0.055 | -.6625547 .0060542              |
| Peer Effect vs PE + SQ | -.342216  | .1511615  | -2.26        | 0.044 | -.676605 -.0078269              |

```
. pwmean pass_limitliberty, over(treatments) mcompare(dunnett) effects
```

Pairwise comparisons of means with equal variances

```
over          : treatments
```

|            | Number of Comparisons |
|------------|-----------------------|
| treatments | 2                     |

| pass_limitliberty      | Contrast | Std. Err. | Dunnett<br>t | P> t  | Dunnett<br>[95% Conf. Interval] |
|------------------------|----------|-----------|--------------|-------|---------------------------------|
| treatments             |          |           |              |       |                                 |
| Status Quo vs PE + SQ  | .0112567 | .1564566  | 0.07         | 0.996 | -.3348457 .3573592              |
| Peer Effect vs PE + SQ | .4127995 | .156496   | 2.64         | 0.016 | .0666098 .7589892               |

```
. pwmean pass_socialfabric, over(treatments) mcompare(dunnett) effects
```

Pairwise comparisons of means with equal variances

```
over      : treatments
```

|            | Number of Comparisons |
|------------|-----------------------|
| treatments | 2                     |

| pass_socialfabric      | Contrast | Std. Err. | Dunnett<br>t | P> t  | Dunnett<br>[95% Conf. Interval] |
|------------------------|----------|-----------|--------------|-------|---------------------------------|
| treatments             |          |           |              |       |                                 |
| Status Quo vs PE + SQ  | .1885545 | .1504126  | 1.25         | 0.349 | -.144178 .521287                |
| Peer Effect vs PE + SQ | .3994155 | .1503742  | 2.66         | 0.015 | .0667679 .732063                |

```
. pwmean pass_privacy, over(treatments) mcompare(dunnett) effects
```

Pairwise comparisons of means with equal variances

```
over      : treatments
```

|            | Number of Comparisons |
|------------|-----------------------|
| treatments | 2                     |

| pass_privacy           | Contrast | Std. Err. | Dunnett<br>t | P> t  | Dunnett<br>[95% Conf. Interval] |
|------------------------|----------|-----------|--------------|-------|---------------------------------|
| treatments             |          |           |              |       |                                 |
| Status Quo vs PE + SQ  | .0242501 | .1535262  | 0.16         | 0.982 | -.3153699 .3638702              |
| Peer Effect vs PE + SQ | .3081429 | .153214   | 2.01         | 0.081 | -.0307866 .6470724              |

```
. pwmean pass_unfair_travel, over(treatments) mcompare(dunnett) effects
```

Pairwise comparisons of means with equal variances

```
over      : treatments
```

|            | Number of Comparisons |
|------------|-----------------------|
| treatments | 2                     |

| pass_unfair_travel     | Contrast  | Std. Err. | Dunnett<br>t | P> t  | Dunnett<br>[95% Conf. Interval] |
|------------------------|-----------|-----------|--------------|-------|---------------------------------|
| treatments             |           |           |              |       |                                 |
| Status Quo vs PE + SQ  | -.1931835 | .1536769  | -1.26        | 0.347 | -.533137 .1467699               |
| Peer Effect vs PE + SQ | .2454575  | .153834   | 1.60         | 0.193 | -.0948435 .5857585              |

```
. pwmean pass_unfair_harmlocals, over(treatments) mcompare(dunnett) effects
```

Pairwise comparisons of means with equal variances

```
over      : treatments
```

|            | Number of Comparisons |
|------------|-----------------------|
| treatments | 2                     |

| pass_unfair_harmlocals | Contrast | Std. Err. | Dunnett<br>t | P> t  | Dunnett<br>[95% Conf. Interval] |
|------------------------|----------|-----------|--------------|-------|---------------------------------|
| treatments             |          |           |              |       |                                 |
| Status Quo vs PE + SQ  | .0552299 | .1458728  | 0.38         | 0.901 | -.26746 .3779197                |
| Peer Effect vs PE + SQ | .4178448 | .1458728  | 2.86         | 0.008 | .0951549 .7405346               |

```
. pwmean pass_forge, over(treatments) mcompare(dunnett) effects
```

Pairwise comparisons of means with equal variances

```
over      : treatments
```

|            | Number of Comparisons |
|------------|-----------------------|
| treatments | 2                     |

| pass_forge             | Contrast | Std. Err. | Dunnett<br>t | P> t  | Dunnett<br>[95% Conf. Interval] |
|------------------------|----------|-----------|--------------|-------|---------------------------------|
| treatments             |          |           |              |       |                                 |
| Status Quo vs PE + SQ  | .1351201 | .132768   | 1.02         | 0.490 | -.1585802 .4288204              |
| Peer Effect vs PE + SQ | .2165635 | .1328014  | 1.63         | 0.180 | -.0772106 .5103375              |

```
. pwmean pass_inducevaccine, over(treatments) mcompare(dunnett) effects
```

Pairwise comparisons of means with equal variances

```
over      : treatments
```

|            | Number of Comparisons |
|------------|-----------------------|
| treatments | 2                     |

| pass_inducevaccine     | Contrast  | Std. Err. | Dunnett<br>t | P> t  | Dunnett<br>[95% Conf. Interval] |
|------------------------|-----------|-----------|--------------|-------|---------------------------------|
| treatments             |           |           |              |       |                                 |
| Status Quo vs PE + SQ  | -.102885  | .1267562  | -0.81        | 0.629 | -.3832863 .1775163              |
| Peer Effect vs PE + SQ | -.1762839 | .1267881  | -1.39        | 0.279 | -.4567557 .1041879              |

```
. pwmean pass_flightsinter, over(treatments) mcompare(dunnett) effects
```

Pairwise comparisons of means with equal variances

```
over      : treatments
```

|            | Number of Comparisons |
|------------|-----------------------|
| treatments | 2                     |

| pass_flightsinter      | Contrast  | Std. Err. | Dunnett<br>t | P> t  | Dunnett<br>[95% Conf. Interval] |
|------------------------|-----------|-----------|--------------|-------|---------------------------------|
| treatments             |           |           |              |       |                                 |
| Status Quo vs PE + SQ  | -.1505562 | .1585631  | -0.95        | 0.535 | -.5013186 .2002061              |
| Peer Effect vs PE + SQ | -.1056911 | .1588438  | -0.67        | 0.730 | -.4570745 .2456924              |

```
. pwmean pass_intentionalinfection, over(treatments) mcompare(dunnett) effects
```

Pairwise comparisons of means with equal variances

```
over      : treatments
```

|            | Number of Comparisons |
|------------|-----------------------|
| treatments | 2                     |

| pass_intentionalinfec~n | Contrast | Std. Err. | Dunnett<br>t | P> t  | Dunnett<br>[95% Conf. Interval] |
|-------------------------|----------|-----------|--------------|-------|---------------------------------|
| treatments              |          |           |              |       |                                 |
| Status Quo vs PE + SQ   | .036557  | .0747995  | 0.49         | 0.842 | -.1289094 .2020234              |
| Peer Effect vs PE + SQ  | -.008699 | .0748389  | -0.12        | 0.990 | -.1742526 .1568545              |

```
. pwmean pass_proscons, over(treatments) mcompare(dunnett) effects
```

Pairwise comparisons of means with equal variances

```
over      : treatments
```

|            | Number of Comparisons |
|------------|-----------------------|
| treatments | 2                     |

| pass_proscons          | Contrast  | Std. Err. | Dunnett t | P> t  | Dunnett [95% Conf. Interval] |
|------------------------|-----------|-----------|-----------|-------|------------------------------|
| treatments             |           |           |           |       |                              |
| Status Quo vs PE + SQ  | -.1014124 | .1494077  | -0.68     | 0.721 | -.4319219 .229097            |
| Peer Effect vs PE + SQ | -.3674023 | .1494077  | -2.46     | 0.026 | -.6979117 -.0368929          |

```
. pwmean f1, over(treatments) mcompare(dunnett) effects
```

Pairwise comparisons of means with equal variances

```
over      : treatments
```

|            | Number of Comparisons |
|------------|-----------------------|
| treatments | 2                     |

| f1                     | Contrast  | Std. Err. | Dunnett t | P> t  | Dunnett [95% Conf. Interval] |
|------------------------|-----------|-----------|-----------|-------|------------------------------|
| treatments             |           |           |           |       |                              |
| Status Quo vs PE + SQ  | -.0226508 | .04662    | -0.49     | 0.843 | -.1257803 .0804786           |
| Peer Effect vs PE + SQ | -.087957  | .0465308  | -1.89     | 0.106 | -.1908892 .0149753           |

| vaccine_status                 | Freq. | Percent | Cum.   |
|--------------------------------|-------|---------|--------|
| Both doses received            | 2,277 | 57.07   | 57.07  |
| No dose: doesn't want vaccine  | 368   | 9.22    | 66.29  |
| No dose: doubts over vaccine   | 475   | 11.90   | 78.20  |
| No dose: wants vaccine         | 410   | 10.28   | 88.47  |
| One dose: doubts on 2nd        | 23    | 0.58    | 89.05  |
| One dose: intention to get 2nd | 431   | 10.80   | 99.85  |
| One dose: no intention for 2nd | 6     | 0.15    | 100.00 |
| Total                          | 3,990 | 100.00  |        |

#### 4. Spillover effects on vaccination intention



Table S15: Determinants of vaccination intention for respondents who have not yet received any dose of the vaccine after the introduction of the pass table

|                                   | (1)                   | (2)                   | (3)                   | (4)                   | (5)                   | (6)                   |
|-----------------------------------|-----------------------|-----------------------|-----------------------|-----------------------|-----------------------|-----------------------|
|                                   | Vaccination intention |
| Status Quo                        | 0.0111<br>(0.928)     | 0.0111<br>(0.928)     | -0.0681<br>(0.546)    | -0.0681<br>(0.546)    | 0.00432<br>(0.964)    | 0.0124<br>(0.897)     |
| Peer Effect                       | -0.265**<br>(0.033)   | -0.265**<br>(0.033)   | -0.239**<br>(0.044)   | -0.239**<br>(0.044)   | -0.124<br>(0.223)     | -0.120<br>(0.238)     |
| Peer Effect Status Quo            | -0.192<br>(0.122)     | -0.192<br>(0.122)     | -0.178<br>(0.126)     | -0.178<br>(0.126)     | -0.0225<br>(0.824)    | -0.0103<br>(0.919)    |
| Age                               |                       |                       | -0.0189***<br>(0.000) | -0.0189***<br>(0.000) | -0.0132***<br>(0.000) | -0.0123***<br>(0.000) |
| Income                            |                       |                       | -0.00175<br>(0.896)   | -0.00175<br>(0.896)   | 0.00151<br>(0.895)    | -0.00233<br>(0.840)   |
| Female                            |                       |                       | -0.128<br>(0.129)     | -0.128<br>(0.129)     | -0.0798<br>(0.270)    | -0.0673<br>(0.357)    |
| White                             |                       |                       | -0.145<br>(0.130)     | -0.145<br>(0.130)     | -0.111<br>(0.183)     | -0.0918<br>(0.275)    |
| Political Scale                   |                       |                       | -0.240***<br>(0.000)  | -0.240***<br>(0.000)  | -0.141***<br>(0.000)  | -0.138***<br>(0.000)  |
| Education                         |                       |                       | 0.101***<br>(0.003)   | 0.101***<br>(0.003)   | 0.0925***<br>(0.002)  | 0.0747**<br>(0.014)   |
| In full or part time employment   |                       |                       | 0.00988<br>(0.918)    | 0.00988<br>(0.918)    | -0.0611<br>(0.482)    | -0.0806<br>(0.355)    |
| Student                           |                       |                       | 0.573***<br>(0.000)   | 0.573***<br>(0.000)   | 0.498***<br>(0.001)   | 0.479***<br>(0.001)   |
| Republican                        |                       |                       | 0.00900<br>(0.943)    | 0.00900<br>(0.943)    | 0.0487<br>(0.630)     | 0.0307<br>(0.763)     |
| Trust in Federal Government       |                       |                       |                       |                       | 0.0460*<br>(0.094)    | 0.0451*<br>(0.099)    |
| Trust in State Government         |                       |                       |                       |                       | -0.0430**<br>(0.042)  | -0.0431**<br>(0.042)  |
| Trust in CDC                      |                       |                       |                       |                       | 0.224***<br>(0.000)   | 0.226***<br>(0.000)   |
| Trust in Pharmaceutical companies |                       |                       |                       |                       | 0.0602***<br>(0.007)  | 0.0589***<br>(0.008)  |
| Trust in Tech companies           |                       |                       |                       |                       | -0.0308<br>(0.138)    | -0.0346*<br>(0.098)   |
| Frequency of travel               |                       |                       |                       |                       |                       | 0.0812**<br>(0.028)   |
| Constant                          | 3.017***<br>(0.000)   | 3.017***<br>(0.000)   | 4.246***<br>(0.000)   | 4.246***<br>(0.000)   | 2.585***<br>(0.000)   | 2.557***<br>(0.000)   |
| Observations                      | 1253                  | 1253                  | 1192                  | 1192                  | 1158                  | 1158                  |
| Adjusted $R^2$                    | 0.004                 | 0.004                 | 0.170                 | 0.170                 | 0.400                 | 0.403                 |

p-values in parentheses

\*  $p < 0.10$ , \*\*  $p < 0.05$ , \*\*\*  $p < 0.01$

Table S16: Determinants of vaccination intention for respondents who already received the first dose of the vaccine after the introduction of the pass table

|                                   | (1)                   | (2)                   | (3)                   | (4)                   | (5)                   | (6)                   |
|-----------------------------------|-----------------------|-----------------------|-----------------------|-----------------------|-----------------------|-----------------------|
|                                   | Vaccination intention |
| Status Quo                        | -0.209<br>(0.152)     | -0.209<br>(0.152)     | -0.247*<br>(0.085)    | -0.247*<br>(0.085)    | -0.271*<br>(0.062)    | -0.275*<br>(0.059)    |
| Peer Effect                       | -0.0247<br>(0.838)    | -0.0247<br>(0.838)    | -0.0580<br>(0.631)    | -0.0580<br>(0.631)    | -0.0792<br>(0.507)    | -0.0807<br>(0.501)    |
| Peer Effect Status Quo            | 0.196*<br>(0.055)     | 0.196*<br>(0.055)     | 0.161<br>(0.106)      | 0.161<br>(0.106)      | 0.106<br>(0.290)      | 0.103<br>(0.310)      |
| Age                               |                       |                       | 0.0000167<br>(0.997)  | 0.0000167<br>(0.997)  | 0.000856<br>(0.872)   | 0.000271<br>(0.959)   |
| Income                            |                       |                       | 0.0267*<br>(0.055)    | 0.0267*<br>(0.055)    | 0.0235<br>(0.104)     | 0.0243*<br>(0.092)    |
| Female                            |                       |                       | 0.242***<br>(0.006)   | 0.242***<br>(0.006)   | 0.223**<br>(0.013)    | 0.213**<br>(0.015)    |
| White                             |                       |                       | 0.106<br>(0.233)      | 0.106<br>(0.233)      | 0.116<br>(0.202)      | 0.114<br>(0.208)      |
| Political Scale                   |                       |                       | -0.0885***<br>(0.002) | -0.0885***<br>(0.002) | -0.0906***<br>(0.003) | -0.0905***<br>(0.003) |
| Education                         |                       |                       | -0.0281<br>(0.439)    | -0.0281<br>(0.439)    | -0.0450<br>(0.227)    | -0.0353<br>(0.388)    |
| In full or part time employment   |                       |                       | -0.0621<br>(0.552)    | -0.0621<br>(0.552)    | -0.0679<br>(0.550)    | -0.0516<br>(0.646)    |
| Student                           |                       |                       | 0.0956<br>(0.490)     | 0.0956<br>(0.490)     | 0.0781<br>(0.593)     | 0.0842<br>(0.568)     |
| Republican                        |                       |                       | -0.219<br>(0.293)     | -0.219<br>(0.293)     | -0.106<br>(0.595)     | -0.0954<br>(0.629)    |
| Trust in Federal Government       |                       |                       |                       |                       | 0.0288<br>(0.342)     | 0.0275<br>(0.357)     |
| Trust in State Government         |                       |                       |                       |                       | -0.0334<br>(0.238)    | -0.0316<br>(0.257)    |
| Trust in CDC                      |                       |                       |                       |                       | 0.0307<br>(0.215)     | 0.0309<br>(0.212)     |
| Trust in Pharmaceutical companies |                       |                       |                       |                       | 0.00433<br>(0.855)    | 0.00604<br>(0.796)    |
| Trust in Tech companies           |                       |                       |                       |                       | 0.0267<br>(0.236)     | 0.0272<br>(0.229)     |
| Frequency of travel               |                       |                       |                       |                       |                       | -0.0325<br>(0.465)    |
| Constant                          | 4.529***<br>(0.000)   | 4.529***<br>(0.000)   | 4.583***<br>(0.000)   | 4.583***<br>(0.000)   | 4.375***<br>(0.000)   | 4.374***<br>(0.000)   |
| Observations                      | 460                   | 460                   | 445                   | 445                   | 433                   | 433                   |
| Adjusted $R^2$                    | 0.017                 | 0.017                 | 0.085                 | 0.085                 | 0.097                 | 0.096                 |

p-values in parentheses

\*  $p < 0.10$ , \*\*  $p < 0.05$ , \*\*\*  $p < 0.01$

Table S17: Determinants of vaccination intention for respondents who already received both doses of the vaccine after the introduction of the pass table (if a new vaccination cycle is required)

|                                   | (1)                   | (2)                   | (3)                   | (4)                   | (5)                   | (6)                   |
|-----------------------------------|-----------------------|-----------------------|-----------------------|-----------------------|-----------------------|-----------------------|
|                                   | Vaccination intention |
| Status Quo                        | -0.0523<br>(0.263)    | -0.0523<br>(0.263)    | -0.0184<br>(0.693)    | -0.0184<br>(0.693)    | -0.0302<br>(0.497)    | -0.0304<br>(0.494)    |
| Peer Effect                       | 0.000108<br>(0.998)   | 0.000108<br>(0.998)   | 0.00559<br>(0.905)    | 0.00559<br>(0.905)    | 0.00849<br>(0.852)    | 0.00696<br>(0.879)    |
| Peer Effect Status Quo            | -0.0504<br>(0.291)    | -0.0504<br>(0.291)    | -0.0176<br>(0.714)    | -0.0176<br>(0.714)    | -0.0231<br>(0.613)    | -0.0258<br>(0.572)    |
| Age                               |                       |                       | 0.000666<br>(0.681)   | 0.000666<br>(0.681)   | -0.00100<br>(0.534)   | -0.000842<br>(0.599)  |
| Income                            |                       |                       | 0.0169***<br>(0.001)  | 0.0169***<br>(0.001)  | 0.0107**<br>(0.033)   | 0.00955*<br>(0.062)   |
| Female                            |                       |                       | 0.0438<br>(0.208)     | 0.0438<br>(0.208)     | 0.0531<br>(0.117)     | 0.0536<br>(0.114)     |
| White                             |                       |                       | 0.0177<br>(0.663)     | 0.0177<br>(0.663)     | 0.00951<br>(0.811)    | 0.0133<br>(0.740)     |
| Political Scale                   |                       |                       | -0.0871***<br>(0.000) | -0.0871***<br>(0.000) | -0.0749***<br>(0.000) | -0.0747***<br>(0.000) |
| Education                         |                       |                       | 0.0145<br>(0.315)     | 0.0145<br>(0.315)     | 0.0154<br>(0.268)     | 0.0126<br>(0.378)     |
| In full or part time employment   |                       |                       | -0.0805*<br>(0.066)   | -0.0805*<br>(0.066)   | -0.0841**<br>(0.044)  | -0.0876**<br>(0.036)  |
| Student                           |                       |                       | -0.0323<br>(0.621)    | -0.0323<br>(0.621)    | -0.0828<br>(0.191)    | -0.0864<br>(0.173)    |
| Republican                        |                       |                       | -0.152*<br>(0.058)    | -0.152*<br>(0.058)    | -0.0765<br>(0.316)    | -0.0799<br>(0.297)    |
| Trust in Federal Government       |                       |                       |                       |                       | 0.0137<br>(0.226)     | 0.0133<br>(0.237)     |
| Trust in State Government         |                       |                       |                       |                       | -0.0116<br>(0.221)    | -0.0119<br>(0.209)    |
| Trust in CDC                      |                       |                       |                       |                       | 0.0686***<br>(0.000)  | 0.0691***<br>(0.000)  |
| Trust in Pharmaceutical companies |                       |                       |                       |                       | 0.0140<br>(0.172)     | 0.0143<br>(0.161)     |
| Trust in Tech companies           |                       |                       |                       |                       | 0.00523<br>(0.647)    | 0.00482<br>(0.671)    |
| Frequency of travel               |                       |                       |                       |                       |                       | 0.0182<br>(0.254)     |
| Constant                          | 4.706***<br>(0.000)   | 4.706***<br>(0.000)   | 4.717***<br>(0.000)   | 4.717***<br>(0.000)   | 4.241***<br>(0.000)   | 4.235***<br>(0.000)   |
| Observations                      | 2275                  | 2275                  | 2158                  | 2158                  | 2121                  | 2121                  |
| Adjusted $R^2$                    | -0.000                | -0.000                | 0.055                 | 0.055                 | 0.115                 | 0.115                 |

p-values in parentheses

\*  $p < 0.10$ , \*\*  $p < 0.05$ , \*\*\*  $p < 0.01$

Table S18: Determinants of vaccination intention after the introduction of the pass table (aggregating all vaccination intention answers)

|                                   | (1)                   | (2)                   | (3)                   | (4)                   | (5)                   | (6)                   |
|-----------------------------------|-----------------------|-----------------------|-----------------------|-----------------------|-----------------------|-----------------------|
|                                   | Vaccination intention |
| Status Quo                        | -0.0942<br>(0.115)    | -0.0942<br>(0.115)    | -0.0692<br>(0.213)    | -0.0692<br>(0.213)    | -0.0553<br>(0.262)    | -0.0535<br>(0.279)    |
| Peer Effect                       | -0.126**<br>(0.039)   | -0.126**<br>(0.039)   | -0.107*<br>(0.062)    | -0.107*<br>(0.062)    | -0.0695<br>(0.175)    | -0.0705<br>(0.169)    |
| Peer Effect Status Quo            | -0.0978<br>(0.106)    | -0.0978<br>(0.106)    | -0.0501<br>(0.368)    | -0.0501<br>(0.368)    | -0.0318<br>(0.522)    | -0.0331<br>(0.505)    |
| Age                               |                       |                       | -0.0000774<br>(0.968) | -0.0000774<br>(0.968) | -0.00176<br>(0.320)   | -0.00126<br>(0.475)   |
| Income                            |                       |                       | 0.0341***<br>(0.000)  | 0.0341***<br>(0.000)  | 0.0213***<br>(0.000)  | 0.0186***<br>(0.001)  |
| Female                            |                       |                       | -0.0743*<br>(0.071)   | -0.0743*<br>(0.071)   | -0.0312<br>(0.399)    | -0.0258<br>(0.486)    |
| White                             |                       |                       | 0.0115<br>(0.805)     | 0.0115<br>(0.805)     | -0.00302<br>(0.943)   | 0.00627<br>(0.882)    |
| Political Scale                   |                       |                       | -0.229***<br>(0.000)  | -0.229***<br>(0.000)  | -0.159***<br>(0.000)  | -0.158***<br>(0.000)  |
| Education                         |                       |                       | 0.161***<br>(0.000)   | 0.161***<br>(0.000)   | 0.120***<br>(0.000)   | 0.111***<br>(0.000)   |
| In full or part time employment   |                       |                       | -0.0167<br>(0.762)    | -0.0167<br>(0.762)    | -0.0318<br>(0.520)    | -0.0437<br>(0.376)    |
| Student                           |                       |                       | 0.449***<br>(0.000)   | 0.449***<br>(0.000)   | 0.282***<br>(0.000)   | 0.271***<br>(0.000)   |
| Republican                        |                       |                       | -0.339***<br>(0.000)  | -0.339***<br>(0.000)  | -0.155**<br>(0.031)   | -0.163**<br>(0.023)   |
| Trust in Federal Government       |                       |                       |                       |                       | 0.0305*<br>(0.013)    | 0.0301**<br>(0.014)   |
| Trust in State Government         |                       |                       |                       |                       | -0.0257***<br>(0.010) | -0.0266***<br>(0.008) |
| Trust in CDC                      |                       |                       |                       |                       | 0.178***<br>(0.000)   | 0.179***<br>(0.000)   |
| Trust in Pharmaceutical companies |                       |                       |                       |                       | 0.0600***<br>(0.000)  | 0.0599***<br>(0.000)  |
| Trust in Tech companies           |                       |                       |                       |                       | -0.0310***<br>(0.008) | -0.0324***<br>(0.005) |
| Frequency of travel               |                       |                       |                       |                       |                       | 0.0474***<br>(0.008)  |
| Constant                          | 4.181***<br>(0.000)   | 4.181***<br>(0.000)   | 3.910***<br>(0.000)   | 3.910***<br>(0.000)   | 2.827***<br>(0.000)   | 2.818***<br>(0.000)   |
| Observations                      | 3993                  | 3993                  | 3799                  | 3799                  | 3716                  | 3716                  |
| Adjusted $R^2$                    | 0.000                 | 0.000                 | 0.195                 | 0.195                 | 0.357                 | 0.358                 |

p-values in parentheses

\*  $p < 0.10$ , \*\*  $p < 0.05$ , \*\*\*  $p < 0.01$
